# Differential aberrant structural synaptic plasticity in axons and dendrites ahead of their degeneration in tauopathy

Johanna S. Jackson<sup>\*1,3+</sup>, James D. Johnson<sup>\*1,2,4</sup>, Soraya Meftah<sup>1,5</sup>, Tracey K Murray<sup>1</sup>, Zeshan Ahmed<sup>1</sup>, Matteo Fasiolo<sup>6</sup>, Michael L. Hutton<sup>1</sup>, John T.R. Isaac<sup>1,7</sup>, Michael J. O'Neill<sup>1,8</sup> & Michael C. Ashby<sup>2+</sup>

\* equal contributions

+ corresponding authors

<sup>1</sup> Eli Lilly & Co. Ltd., Erl Wood Manor, Windlesham, Surrey GU20 6PH, UK

<sup>2</sup> School of Physiology, Pharmacology and Neuroscience, University of Bristol, Biomedical Sciences Building, University Walk, Bristol BS8 1TD, UK

<sup>2</sup> current address – UK Dementia Research Institute at Imperial College, Department of Brain Sciences, Imperial College London, London, UK

<sup>4</sup> current address - John Edward Porter Neuroscience Research Center (Building 35), National Institutes of Health, 35 Convent Drive, Bethesda, MD 20814, USA

<sup>5</sup> current address – School of Physiology, Pharmacology and Neuroscience, University of Bristol, Biomedical Sciences Building, University Walk, Bristol BS8 1TD, UK

<sup>6</sup> School of Mathematics, University of Bristol, Fry Building, Woodland Road, Bristol BS8 1UG, UK

<sup>7</sup> current address – Neuroscience at the J&J London Innovation Centre, One Chapel Place, London, W1G 0BG, UK

<sup>8</sup> current address - AbbVie Deutschland GmbH & Co. K.G., Ludwigshafen, Germany

## 23 Key findings

- 24 • Tauopathy driven by tau P301L in rTg4510 mice causes a progressive decrease in density  
25 of presynaptic terminal boutons and postsynaptic dendritic spines in cortical excitatory  
26 neurons.
- 27 • Longitudinal imaging of individual axons and dendrites shows that there is a huge diversity  
28 of effects at varying times in different cells.
- 29 • Decreases in overall synapse density are driven partly, but not exclusively, by degeneration  
30 of dendrites and axons that are distributed widely across the time-course of disease.
- 31 • Suppression of pathological P301L tau expression can ameliorate accumulation of tau  
32 pathology, synapse loss and neurodegeneration, but only if administered early in disease  
33 progression.
- 34 • Neurite degeneration is preceded by aberrant structural synaptic plasticity in a cell-specific  
35 way that is markedly different in dendrites and axons.
- 36 • Degeneration of dendrites is immediately preceded by dramatic loss of dendritic spines.
- 37 • Axonal loss is characterised by a progressive attenuation of presynaptic bouton plasticity  
38 that starts months before degeneration.

39

## 40 Abstract

41 Neurodegeneration driven by aberrant tau is a key feature of many dementias. Pathological  
42 stages of tauopathy are characterised by reduced synapse density and altered synapse function.  
43 Furthermore, changes in synaptic plasticity have been documented in the early stages of  
44 tauopathy suggesting that they may be a driver of later pathology. However, it remains unclear  
45 if synapse plasticity is specifically linked to the degeneration of neurons. This is partly because,  
46 in progressive dementias, pathology can vary widely from cell-to-cell along the prolonged  
47 disease time-course. To overcome this variability, we have taken a longitudinal experimental  
48 approach to track individual neurons through the progression of neurodegenerative tauopathy.  
49 Using repeated *in vivo* 2-photon imaging in rTg4510 transgenic mice, we have measured  
50 structural plasticity of presynaptic terminal boutons and postsynaptic spines on individual  
51 axons and dendrites over long periods of time. By following individual neurons, we have  
52 measured synapse density across the neuronal population and tracked changes in synapse  
53 turnover in each neuron. We found that tauopathy drives a reduction in density of both  
54 presynaptic and postsynaptic structures and that this is partially driven by degeneration of  
55 individual axons and dendrites that are spread widely across the disease time-course. Both  
56 synaptic loss and neuronal degeneration was ameliorated by reduction in expression of the  
57 aberrant P301L transgene, but only if that reduction was initiated early in disease progression.  
58 Notably, neurite degeneration was preceded by alterations in synapse turnover that contrasted  
59 in axons and dendrites. In dendrites destined to die, there was a dramatic loss of spines in the  
60 week immediately before degeneration. In contrast, axonal degeneration was preceded by a  
61 progressive attenuation of presynaptic turnover that started many weeks before axon  
62 disappearance. Therefore, changes in synapse plasticity are harbingers of degeneration of  
63 individual neurites that occur at differing stages of tau-driven neurodegenerative disease,

- 64 suggesting a cell or neurite autonomous process. Furthermore, the links between synapse
- 65 plasticity and degeneration are distinct in axonal and dendritic compartments.

## 66 Introduction

67 Decreased synapse density is a cardinal feature of neurodegenerative dementia (Scheff et  
68 al., 2006; Spires-Jones and Hyman, 2014). Furthermore, dysfunctional neurotransmission and  
69 changes in synaptic plasticity have been documented in many animal models of dementia,  
70 leading to the idea of synaptic normalisation as a potential therapeutic target (Forner et al.,  
71 2017; Herms and Dorostkar, 2016; Jackson et al., 2019). However, the links between changes  
72 in synaptic plasticity, synapse loss and neurodegeneration are still poorly understood.

73 In tauopathy-related dementias, such as Alzheimer's Disease (AD), increasingly aberrant  
74 and hyperphosphorylated tau is associated with synapse loss, neuronal death and the cognitive  
75 symptoms that are observed (Gendron and Petrucelli, 2009; Nelson et al., 2012). Aberrant tau  
76 in various forms is almost ubiquitously reported to cause overall reduction in synapse number,  
77 including observations in the rTg4510 mouse model, which expresses a hyperphosphorylated  
78 P301L version of tau (Jackson et al., 2017; Kopeikina et al., 2013). Both pre- and postsynaptic  
79 impairments driven by aberrant tau have been documented using multiple methods across a  
80 range of disease timepoints. At presynaptic sites, neurotransmitter release probability is  
81 reduced in human tau-expressing mice (Polydoro et al., 2009). This impairment is potentially  
82 mediated by the N-terminal of tau directly associating with pre-synaptic vesicles, which causes  
83 impairment in prolonged synaptic release and synaptic vesicle motility in fly and rat neurons  
84 (Zhou et al., 2017). Additionally, P301L tau induces changes in presynaptic vesicular  
85 glutamate transporters and glutamate transporter 1 (GLT-1), resulting in increased glutamate  
86 release and decreased extracellular clearance (Hunsberger et al., 2015). Presynaptic  
87 electrophysiological deficits have also been observed in transgenic mice which express the  
88 P301L tau mutation (Polydoro et al., 2009, 2014). In contrast, overexpressed human TauP301L  
89 has been shown to accumulate at presynaptic sites without causing any cognitive disruption  
90 (Harris et al., 2012). Although tau is predominantly localised to axons in healthy neurons,

91 elevated levels of hyperphosphorylated tau is found in the somatodendritic compartment,  
92 including perisynaptic areas (Hoover et al., 2010; Ittner et al., 2010). Indeed, it has been  
93 suggested that hyperphosphorylated tau may actually be concentrated at postsynaptic locations  
94 (Tai et al., 2012), perhaps due to its trans-synaptic spread that can occur early in the disease  
95 (Pickett et al., 2017). As such, many studies investigating synapse loss and dysfunction have  
96 focused on the postsynaptic changes associated with aberrant tau (Ittner and Ittner, 2018).  
97 Postsynaptic dysfunction can be driven by missorting of tau into the postsynaptic region along  
98 with the Src kinase, Fyn (Ittner et al., 2010). Fyn alters NMDAR phosphorylation and its  
99 interaction with the postsynaptic density protein 95 (PSD-95). This over-stabilises NMDARs  
100 at the postsynaptic site, resulting in excessive calcium influx and damage through  
101 excitotoxicity (Ittner et al., 2010; Mondragón-Rodríguez et al., 2012). There is also substantial  
102 evidence that aberrant tau can affect synaptic plasticity. Synaptic long-term potentiation (LTP)  
103 is reduced in transgenic mouse lines expressing mutated forms of tau (Rosenmann et al., 2008;  
104 Yoshiyama et al., 2007). Reduced size and prevalence of mature “mushroom” dendritic spines  
105 suggests a weakening of synapses driven in mouse models of tauopathy (Crimins et al., 2012;  
106 Jackson et al., 2017). Furthermore, the structural plasticity underlying addition and removal of  
107 synapses is impacted in the rTg4510 mouse (Jackson et al., 2017). Given the central role of  
108 NMDARs in induction of several forms of synaptic plasticity, it is tempting to link tau-induced  
109 changes in synapse plasticity to spine loss and subsequent neurodegeneration, but it is unclear  
110 how, when and where in the cell these processes might coincide (Ittner and Ittner, 2018;  
111 Miyamoto et al., 2017; Tackenberg and Brandt, 2009).

112 Several studies have identified synaptic changes that occur ahead of the onset of classic  
113 histopathological markers and frank neurodegeneration, suggesting a causal role in progression  
114 of tauopathy (Menkes-Caspi et al., 2015; Rocher et al., 2010; Yoshiyama et al., 2007; Zhou et  
115 al., 2017). However, there are even more reports of synaptic dysfunction and/or aberrant

116 plasticity during later, neurodegenerative phases of tauopathy (Booth et al., 2016; Crimins et  
117 al., 2012). Some of these late changes do not always mirror those found early in disease, even  
118 in similar brain areas. It is perhaps unsurprising that synaptic alterations may go through  
119 different phases as tauopathy progresses, but these contradictions highlight the lack of  
120 understanding of the specificity and timing of pre- and post-synaptic changes in relation to the  
121 pathology consuming the parent neurons.

122 In this study, we have used longitudinal *in vivo* two-photon imaging over extended periods  
123 to track synaptic alterations and degeneration of neuronal processes across the time-course of  
124 tauopathy in rTg4510 mice. Tracking individual axons and dendrites at frequent intervals  
125 across long periods of time allowed us to capture the diversity of neuronal changes related to  
126 different stages of progressive tauopathy, including the moment of neurite degeneration. We  
127 have identified alterations in synapse turnover that manifest in the weeks before neurite  
128 degeneration. These changes are strikingly different in pre- and post-synaptic compartments in  
129 both their effects and in their time-course.

## 130 Results

### 131 The time-course of synapse loss in rTg4510 mice

132 To characterise the dynamics of synapse turnover and degeneration across the time-course  
133 of tauopathy, we used *in vivo* 2-photon microscopy to repeatedly image axonal and dendritic  
134 structure of cortical pyramidal neurons in rTg4510 mice. We imaged from early, pre-  
135 pathological stages through to ages associated with overt signs of neurodegenerative disease.  
136 To enable chronic measurements, we implanted cranial windows in rTg4510 mice and wild-  
137 type (WT) littermates having transduced the underlying somatosensory cortex with AAV that  
138 drives expression of GFP in excitatory neurons. Following a post-surgical recovery period,  
139 GFP-expressing dendritic and axonal branches that ramified in layer 1 were imaged in head-  
140 fixed anaesthetised mice. To ensure coverage of a large portion of the progressive development  
141 of pathology, we imaged animals in four batches that were staggered in their age at the start of  
142 imaging (20, 24, 28 and 32 weeks old). Within these batches, animals were imaged weekly for  
143 up to 26 weeks (median number of imaging sessions was 16). This experimental design  
144 produced longitudinal data that spanned from approximately 4.5 months old, when there is  
145 little cortical atrophy in rTg4510 mice, to 12 months old, when these mice have substantial  
146 cortical loss and display dramatic neurological deficits (Ramsden et al., 2005; Holmes et al.,  
147 2016).

148 First, we measured alterations in synapse density in labelled cells by identifying and  
149 counting dendritic spines and axonal terminaux boutons (TBs) in each imaging session (Figures  
150 1&2). Dendrites were distinguished by a relatively straight and wide shaft with spines  
151 protruding that had characteristic bulbous heads and short necks (Holtmaat et al., 2009)(Figure  
152 1A). In contrast, axons had a thinner shaft with a greater tortuosity (Holtmaat et al.,  
153 2009)(Figure 1A & 2A). Most axons were studded with protruding terminaux boutons (TBs)



154 that varied dramatically in shape but tended to have long necks, as well as occasional *en passant*  
155 swellings (Figure 1A & 2A). In total, we imaged 114 dendrites across 1688 image stacks  
156 (Figure 1) and 106 axons across 1382 image stacks (Figure 2) from 20 WT and 20 rTg4510  
157 animals.

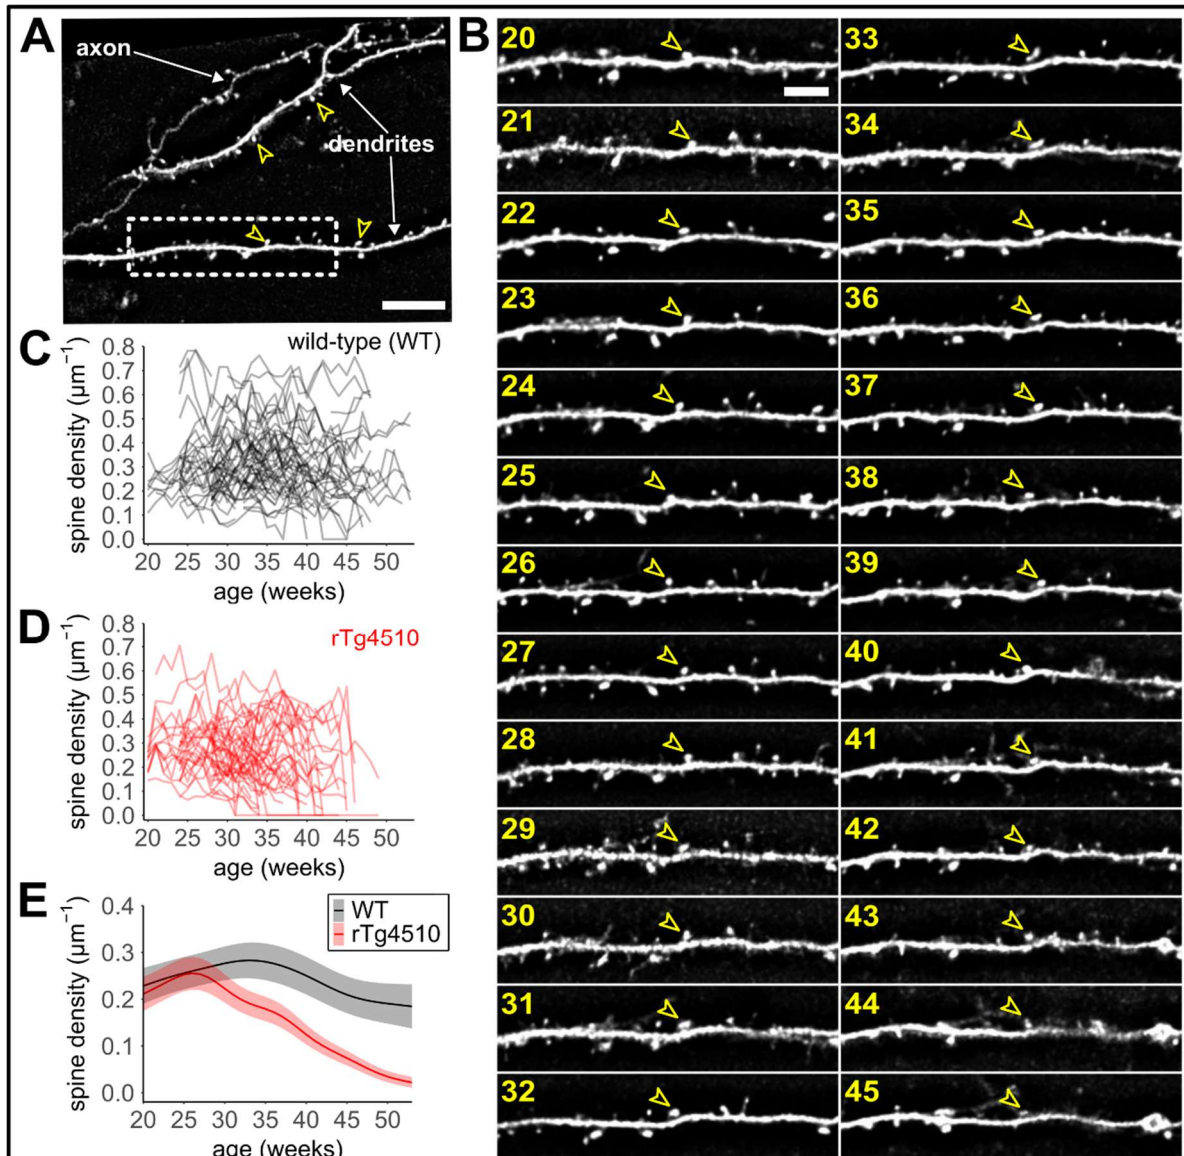

**Figure 1 - Longitudinal tracking of dendritic spine loss in rTg4510 mice.**

(A) Typical 2-photon field of view of somatosensory cortex containing sparsely-labelled dendrites. Example dendritic spines marked with empty arrowheads. Note that there is also an axon in the upper left of the field of view. Scale bar, 20 $\mu\text{m}$ .

(B) Example of repeated weekly imaging of the same dendritic branch (from dashed box in (A)) across periods of time (age in weeks shown in yellow). Individual spines were identified in each imaging session (example shown by arrowhead). Scale bar, 5 $\mu\text{m}$ .

(C) Density of spines over time for each of 60 dendrites tracked in 20 wild-type (WT) mice.

(D) Density of spines over time for each of 54 dendrites tracked in 20 rTg4510 tauopathy mice.

(E) Predictions from a GAMM based on data in (B) and (C) modelling changes in overall spine density across the population over time (shaded area represents 95% confidence limits of model estimate shown by line).

158 Within each imaged dendrite, we could readily identify many spines that persisted across long  
159 periods of time as well as others that appeared or disappeared from one week to the next (Figure  
160 1B). The longitudinal imaging of these structural dynamics allowed us to determine the density  
161 of spines on each dendrite across time (Figure 1C&D; n=60 WT, 54 rTg4510 dendrites from  
162 20 mice). We observed quite divergent dynamics in spine density in individual dendrites  
163 (Figure 1C&D). This was particularly the case in rTg4510 animals in which some neurites  
164 showed dramatic losses of spines or TBs, whereas others had relatively stable density even at  
165 older ages (Figure 1D). To estimate the overall effect of genotype on the dynamics of spine  
166 density across the entire imaged population we fitted Generalised Additive Mixed Models  
167 (GAMMs) to these data. GAMMs have the major advantage of not enforcing predetermined  
168 assumptions about the trajectory of the data while also accounting for longitudinality (including  
169 missing timepoints) and hierarchical experimental design (i.e. multiple neurons within each  
170 animal, see Methods for further description)(van Rij et al., 2019; Shadish et al., 2014; Wood,  
171 2017). Overall, the GAMM fit the dataset well, explaining 83.9% of deviance for dendritic  
172 spine density data ( $R_{sq} = 0.85$ ). In line with previous data, population spine density was  
173 relatively stable over time in WT animals (Figure 1E; Grutzendler et al., 2002; Jackson et al.,  
174 2017). In contrast, the overall density of postsynaptic spines progressively decreased with age  
175 in rTg4510s (Figure 1E). In the early stages of our imaging, which corresponds to largely pre-  
176 degenerative phases of the disease, WT and rTg4510 dendritic spine density was similarly  
177 stable around  $\sim 0.2\mu\text{m}^{-1}$  (Figure 1E). Between 25-30 weeks of age, the trajectory of WT and  
178 rTg4510 diverge, with WT remaining relatively stable for the next few months of imaging,  
179 whereas there is a continual decline in the spine density of rTg4510s across this period. By the  
180 end of our imaging period, at  $\sim 50$  weeks old, the majority of, but not all, dendrites in rTg4510  
181 animals either have very few spines or have disappeared altogether. Genotype has a significant  
182 effect on model estimates (Wald test,  $p = 0.025$  for genotype as fixed factor) as suggested by

183 the diverging trajectories for each WT and rTg4510 dendrites. We further tested the influence  
184 of each factor in the GAMM by comparing to an analogous model lacking the factor in  
185 question. This approach showed that genotype has a major influence on the predictions as its  
186 inclusion significantly improved fit to the data (lower Akaike Information Criteria (AIC), Chi-

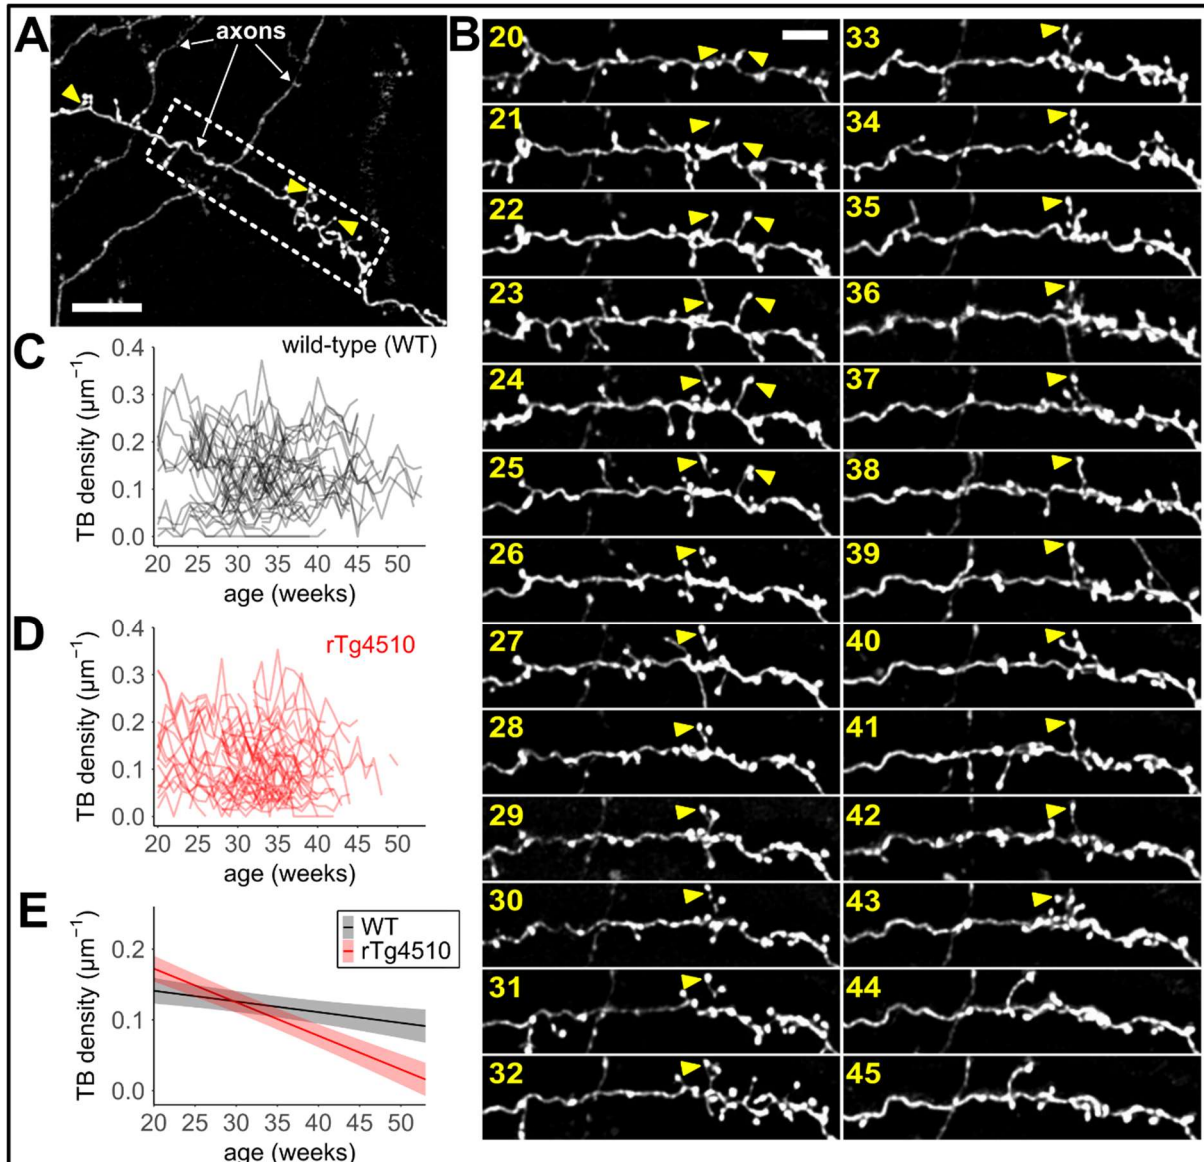

**Figure 2 - Longitudinal tracking of terminaux boutons in rTg4510 mice.**

(A) Typical 2-photon field of view of somatosensory cortex containing sparsely-labelled axons. Example terminaux boutons (TBs) are marked with arrowheads. Scale bar, 20µm.

(B) Example of repeated weekly imaging of the same axonal branch (from dashed box in (A)) across periods of time (age in weeks shown in yellow). Individual TBs were identified in each imaging session (examples shown by arrowhead). Scale bar, 5µm.

(C) Density of TBs over time for each of 51 axons tracked in 20 wild-type (WT) mice.

(D) Density of spines over time for each of 55 axons tracked in 20 rTg4510 tauopathy mice.

(E) Predictions from a GAMM based on data in (C) and (D) modelling changes in overall TB density across the population over time (shaded area represents 95% confidence limits of model estimate shown by line).

187 square test,  $p < 0.001$ ). In contrast, variance associated with individual animals had only small  
188 effect on model predictions (Supplementary Figure 1A) and the batch had almost no effect  
189 (Supplementary Figure 1B).

190 In axons, we were again able to track individual TBs over long periods of time, but these  
191 protrusions were generally more dynamic than dendritic spines in their addition/removal and  
192 in their shape (Figure 2B). As with dendrites, longitudinal imaging made it apparent that  
193 changes in TB density varied dramatically in different axons (Figure 2C&D,  $n=51$  WT, 55  
194 rTg4510 axons from 20 mice). To assess the overall impact of these variable dynamics, we  
195 again fitted a GAMM to the WT and rTg4510 data (Figure 2E; 85.5% deviance explained,  $R_{sq}$   
196  $= 0.83$ ). This analysis showed that the overall population density of TBs was  $\sim 0.15 \mu\text{m}^{-1}$  in both  
197 WT and rTg4510 animals at the youngest ages we imaged but there were differing trajectories  
198 over time for each genotype (Figure 2E). Similarly to dendritic spines, the TB density in  
199 rTg4510 animals declined over time compared to WT (Figure 2E). Effects associated with  
200 individual animals (Supplementary Figure 1E) or batch (Supplementary Figure 1F) had very  
201 little effect on model outcomes. The divergence between genotypes appeared to manifest  
202 slightly later than for dendritic spines (between 30-35 weeks, compare to Figure 1E). However,  
203 the decline in presynaptic density was similarly progressive as TB numbers fell to low values  
204 by  $\sim 50$  weeks old (Figure 2E).

## 205 **Progressive degeneration is rescued by early reduction in pathological tau expression**

206 Tauopathy has been characterised as a runaway process in which aberrant tau can propagate  
207 pathology by promoting malfunction of previously healthy protein and cells (Mudher et al.,  
208 2017). In this type of “spreading” mechanism, progression of neuropathology becomes  
209 increasingly independent of the initial insult. This independence can be tested in rTg4510 mice,  
210 because expression of the P301L mutant tau gene is under the control of a tet-off promoter,

211 which allows its suppression by administration of doxycycline (DOX)(Ramsden et al., 2005).  
212 Indeed, when expression is suppressed late in the rTg4510 disease time-course, reducing  
213 mutant tau levels is less effective in reducing gross pathology (Holmes et al., 2016). This does  
214 suggest a disconnect between mutant tau expression and gross neuropathology once the disease  
215 process takes root, but we do not know how and when synaptic changes are shaped by this. To  
216 understand the link between aberrant tau expression and synaptic degeneration, we continually  
217 dosed rTg4510 animals with DOX starting at varying timepoints aligned to our other imaging  
218 batches (18, 22, 26 and 30 weeks old, started at cranial window implantation).

219 Histopathological and qPCR analysis was performed on a subset of brains following fixation  
220 at the end of each imaging time-course to assess the impact of DOX administration on tau  
221 expression and progression of gross pathology. We confirmed that DOX administration did  
222 indeed reduce tau P301L mRNA levels, although not to WT levels (Figure 3A). Tau P301L  
223 expression in vehicle-treated rTg4510 animals was associated with a large reduction in size of  
224 the neocortex (47% reduction in area; Figure 3B), paralleling the forebrain atrophy previously  
225 described in this model (Ramsden et al., 2005). The cortical area of the DOX-treated rTg4510  
226 animals was overall partially restored towards WT levels (38% recovery from mean rTg4510-  
227 associated decrease). However, the cortical area varied widely between different animals, from  
228 values close to WT through to dramatic atrophy that was similar to that in untreated rTg4510s  
229 (Figure 3B). We reasoned that the differing age at the start of dosing may underlie some of the  
230 variability between DOX-treated animals. Therefore, we compared the effects of DOX based  
231 on when administration was begun. The extent of tau suppression appeared to be independent  
232 of either the age at which DOX treatment was started (Figure 3C, 2-way ANOVA,  
233  $F(3,38)=2.32$ ,  $p=0.091$ ), the age at the point of measurement or the total duration for which  
234 DOX was administered (Supplementary Figure 2A&B). These expression profiles suggest that  
235 DOX lowers tau P301L expression consistently across the time-course of the disease. To assess

236 how the reduction of tau expression affected development of pathology, we measured cortical  
 237 levels of PG5, which is a histological marker of hyperphosphorylated tau (Figure 3D). PG5

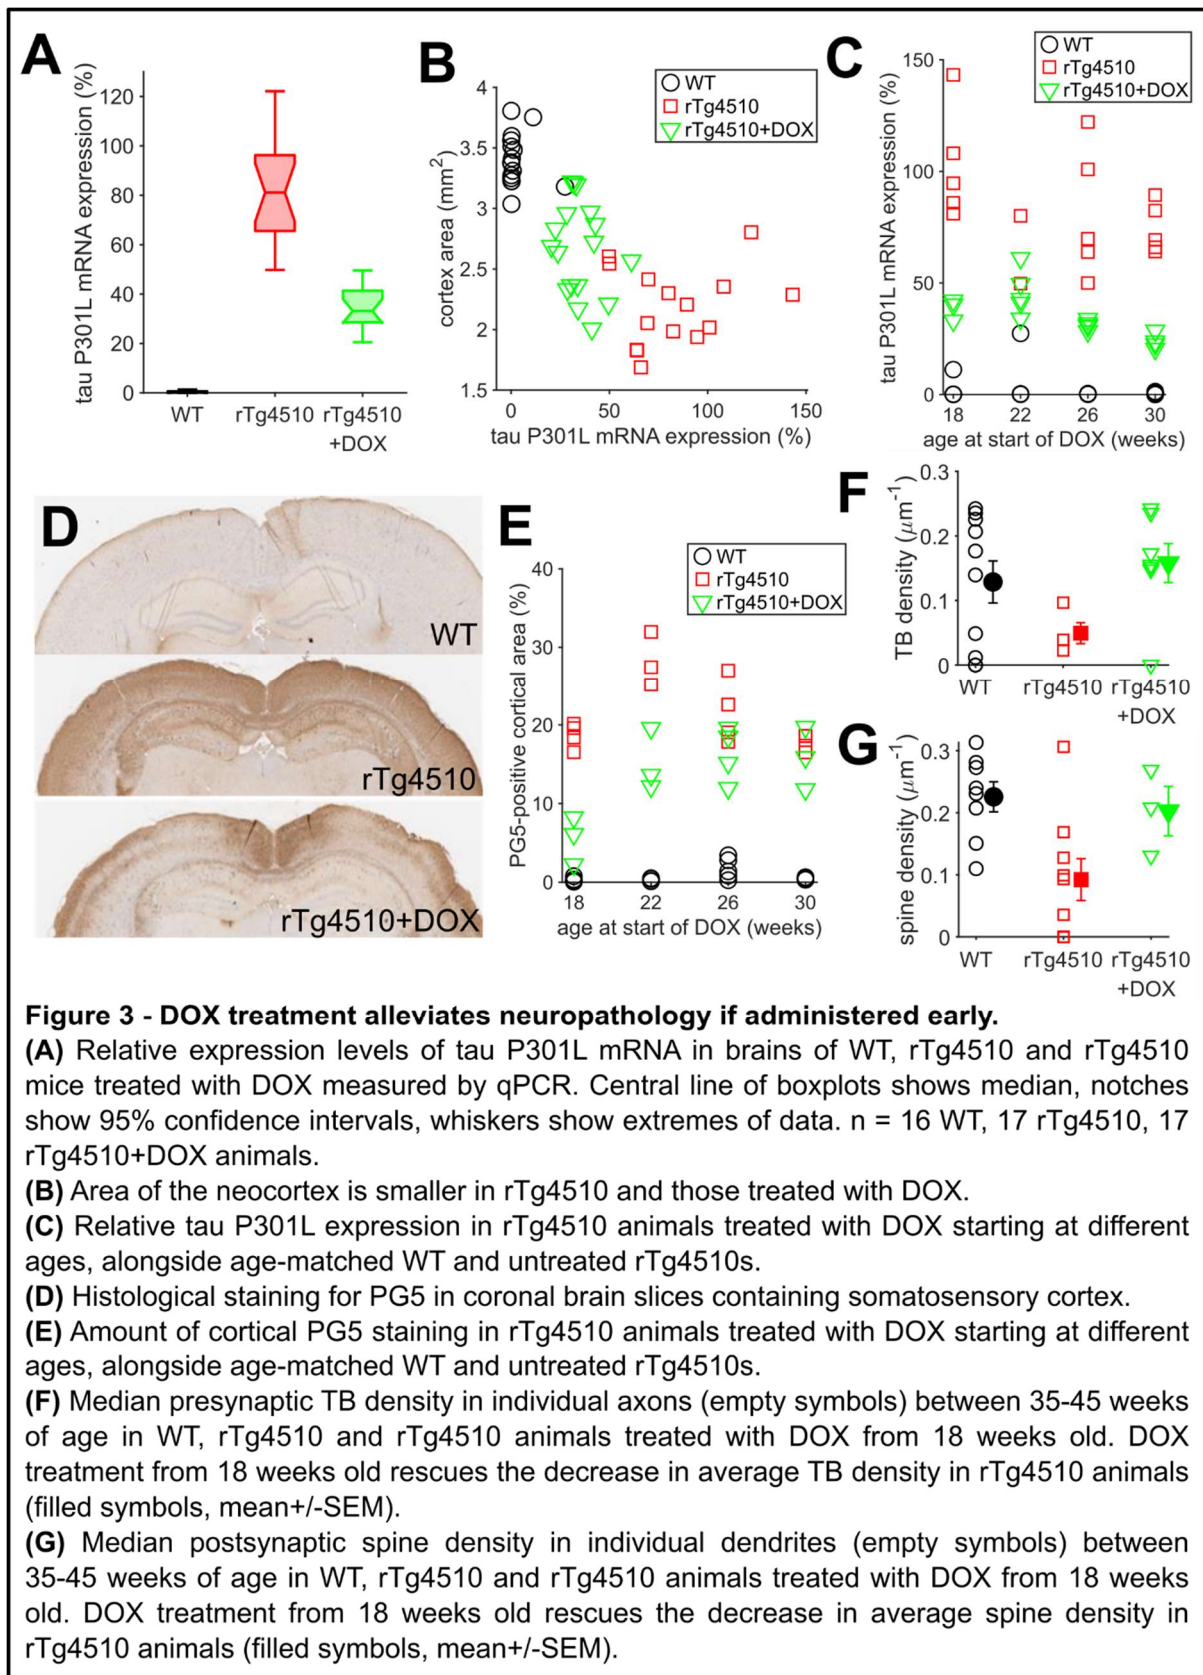

238 staining was similarly prominent across the forebrain in all untreated rTg4510s (age range at  
239 staining was 30-54 weeks; Supplementary Figure 2C) and was negligible in WT mice (Figure  
240 3D&E). We compared the effects of DOX treatment started at the differing ages on PG5  
241 staining. There was a significant interaction between effects of genotype and onset of DOX  
242 treatment on PG5 staining (2-way ANOVA,  $F(6,34)=7.25$ ,  $p<0.001$ ). Post-hoc analysis of  
243 simple main effects confirmed DOX treatment beginning at 18 weeks old significantly reduced  
244 PG5 staining compared to rTg4510s ( $p<0.001$ ) to just above WT levels (Figure 3D,  $p=0.029$ ).  
245 However, DOX administration at later ages (22, 26 and 30 weeks old) was less effective in  
246 reducing PG5 staining as PG5 levels in animals treated from 18 weeks were significantly lower  
247 than when treatment was started later (Figure 3D;  $p<0.001$  compared to each later group). PG5  
248 levels were not related to the total duration of DOX treatment or the age at perfusion  
249 (Supplementary Figure 2D). Therefore, even though mutant tau expression is reduced similarly  
250 when suppression is started at differing ages, the accumulation of hyperphosphorylated tau is  
251 poorly suppressed if DOX is not administered early. Importantly for synaptic imaging, the  
252 cranial window over the right hemisphere did not appear to affect progression of tauopathy or  
253 neuroinflammation as PG5 and IBA-1 levels were similar in both hemispheres across all  
254 genotypes (Supplementary Figure 2E&F).

255 Given its ameliorative effect on pathological markers, we wanted to assess whether DOX  
256 administration from 18 weeks also affects synapses. We therefore compared synapse density  
257 in age-matched imaging sessions from 35-45 weeks old, which is an age range where decreased  
258 synapse density is predicted (Figures 1&2). Specifically, we measured the median TB and spine  
259 density across this time period in individual axons and dendrites in WT, rTg4510 and DOX-  
260 treated (from 18 weeks old) rTg4510 animals (Figure 3F&G). We found that, overall, DOX  
261 rescued the decrease in TB density in rTg4510 animals (Figure 3F; mixed model ANOVA –  
262 animal as random factor,  $F(1,6.115)=8.11$ ,  $p=0.029$ ; post-hoc Tukey: WT vs rTg4510,

263  $p=0.006$ , rTg4510 vs DOX,  $p=0.001$ ). Likewise, spine density was also decreased in rTg4510  
264 animals compared to WT across this age range, and this decrease was rescued by early DOX  
265 treatment (Figure 3G; mixed model ANOVA— animal as random factor,  $F(2,17)=5.58$ ,  
266  $p=0.014$ ; post-hoc Tukey: WT vs rTg4510,  $p=0.003$ , rTg4510 vs DOX,  $p=0.056$ ). Comparison  
267 of individual axons and dendrites showed that there was considerable diversity in synapse  
268 density in all groups between different cells. This variability in synapse density in individual  
269 axons or dendrites did not appear to correlate directly with the level of tau P301L expression  
270 assessed in post-mortem brain tissue (Supplementary Figure 3). This suggests that synapse loss  
271 in rTg4510s is a rather cell-specific phenomenon. Even at seemingly similar global tau P301L  
272 levels, different neurons can range from WT synapse density to very low values or even zero  
273 in neurites that disappeared, taking their synapses with them (Figures 1BD & Supplementary  
274 Figure 3).

### 275 Synapse loss partially relates to dendritic and axonal degeneration

276 The repeated weekly imaging within our 2-photon imaging dataset allowed us to document  
277 the disappearance of some axons and dendrites during the imaging timeline. In many cases  
278 there was specific loss of an individual neurite while others within the same field of view  
279 remained visible and apparently healthy (example in Figure 4C). As such, these neurite losses  
280 appeared to be specific neurodegeneration events. To assess these disappearances of individual  
281 neurites, we generated survival curves for all dendrites and axons for ~6 months across the  
282 experiment (Figure 4A&B). During this time, there was neurite-specific loss of a substantial  
283 minority of imaged dendrites and axons in rTg4510 mice. Overall, ~35% of dendrites (Figure  
284 4A;  $n = 54$  dendrites from 20 animals) and ~14% of axons (Figure 4B;  $n = 55$  axons from 20  
285 animals) were lost between 2.5 and 8.5 months old in rTg4510 animals, whereas there were no  
286 neurites losses in WT mice ( $n = 60$  dendrites and 51 axons from 20 mice). These neurite losses  
287 align with the well-documented gross neurodegenerative phenotype caused by mutant tau in



288 rTg4510 mice (Ramsden et al., 2005; Santacruz et al., 2005). Indeed, DOX administration,  
 289 which suppresses tau P301L expression (Figure 3), also reduced the fraction of degenerating

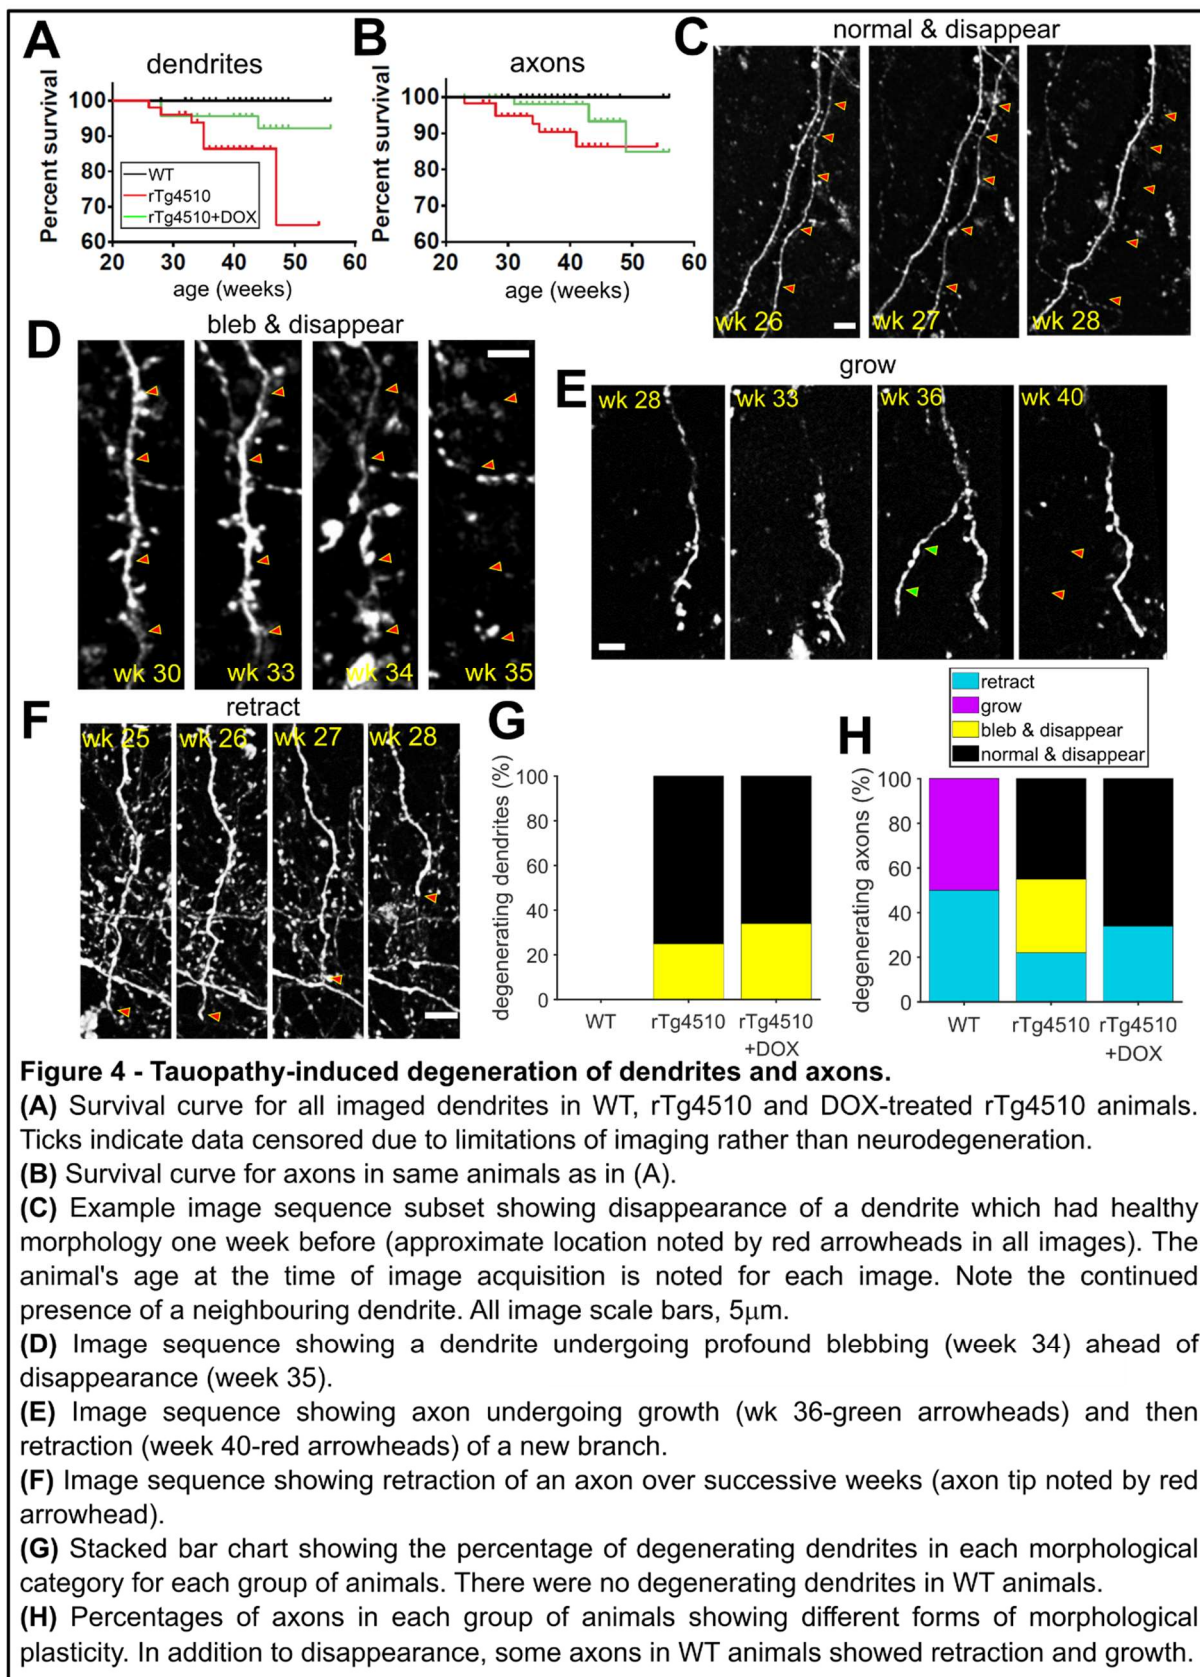

290 dendrites (Figure 4A; log-rank test,  $p < 0.01$ ,  $n = 43$  dendrites from 20 animals in DOX group).  
291 DOX administration also slowed the degeneration of axons, although losses did reach untreated  
292 rTg4510 levels by the end of our experimental recording period at 55 weeks old (Figure 4B;  
293 log-rank test,  $p < 0.05$ ,  $n = 49$  axons from 20 animals in DOX group). As such, by longitudinally  
294 tracking neurites across the development of pathology, we observed the dynamics of the  
295 neurodegenerative process at the level of individual dendrites and axons.

296 Degeneration of neurites occurred heterogeneously, with a variety of morphological  
297 changes occurring ahead of neurite disappearance. The majority of degenerating dendrites  
298 disappeared between adjacent imaging sessions (1 week interval), having had seemingly  
299 healthy structure the week before (normal & disappear; Figure 4C). The other dendrites that  
300 were lost had a classically unhealthy appearance, showing increasingly blebbed and/or beaded  
301 morphology 1-3 weeks preceding their disappearance (bleb & disappear; Figure 4D). Although  
302 the total number of degenerating dendrites was reduced in the DOX-treated mice (Figure 4A),  
303 the proportion of morphologies prior to disappearance was similar to that in untreated rTg4510  
304 mice (Figure 4G). By contrast, in WT animals, dendritic backbone structure was extremely  
305 stable with no dendrites being lost (Figures 4A&G).

306 Axons in WT animals did show some plasticity of backbone structure in the form of  
307 occasional branch retraction (Figure 4E) and growth (Figure 4F). However, across the WT  
308 animals, this remodelling was balanced between retraction and growth, and occurred without  
309 morphological signs of dystrophy (Figure 4H). In contrast, we observed no new growth of  
310 axons in rTg4510 animals, but there was still clear loss of axons (Figure 4H). These axonal  
311 losses were driven by a mixture of retraction and complete disappearance (Figure 4H). As with  
312 dendrites, some axons showed dystrophy gradually, with increasingly blebbed morphology in  
313 the weeks before disappearance, while others showed no signs of pathology before  
314 disappearing between imaging sessions only 1 week apart (Figure 4H). DOX-treated rTg4510

315 animals similarly had no new growth of axons and the losses were a mixture of retractions and  
316 rapid disappearance (Figure 4H). We did not observe blebbing axons in DOX-treated rTg4510  
317 animals in apparent contrast to untreated rTg4510s, but numbers were too small to be certain  
318 of this difference.

319 The neurite losses in rTg4510s occurred at widely varying times. Indeed, it is notable that,  
320 while some neurites degenerated quite early in disease progression (<25 weeks old), the  
321 disappearance of others is scattered in time through to the end of our imaging period (55 weeks  
322 old) (Figure 4A&B). Furthermore, most of the imaged neurites survived to the end of the  
323 imaging with little sign of dystrophy, even when they were neighbouring others that had  
324 undergone degeneration (Figure 4C). This highlights the variability of the degeneration at the  
325 neuronal level and the fact that individual neurites and/or cells are selectively vulnerable.

#### 326 **Increased loss of spines just prior to dendrite loss**

327 Synaptic dysfunction has been implicated in neurodegenerative disease in rTg4510 mice  
328 (Jackson et al., 2017; Kopeikina et al., 2013) and more widely (Selkoe, 2002). Furthermore,  
329 some mechanisms that can promote neurite degeneration have been linked to synaptic activity  
330 and function (Miyamoto et al., 2017). To investigate potential links between synaptic  
331 characteristics and neurite degeneration, we took advantage of our longitudinal approach to  
332 align degenerating neurites in time to the week of their disappearance. This allowed us to ask  
333 what was happening to synaptic structures in the weeks preceding degeneration. Since each  
334 degenerating neurite had at least one other surviving neurite nearby, we also aligned these non-  
335 dystrophic neurites in time to directly compare the differences between synaptic characteristics  
336 in degenerating and non-degenerating neurites. To measure gains and losses of synaptic  
337 structures in dendrites, we tracked each dendritic spine across all the imaging sessions. Because  
338 individual neurite degeneration occurred at varying stages of the experiment, there were a  
339 variable number of imaging weeks preceding each degeneration event. Therefore, we fitted

340 GAMMs to the data to assess synaptic effects across the populations of degenerating neurites,  
341 and matched non-degenerating comparators. Spine turnover dynamics in dendrites destined to  
342 be lost were well-matched to those in non-degenerating dendrites in the periods well before the  
343 moment of degeneration (Figure 5A; GAMMs based on 20 axons from 9 animals). However,  
344 we found that there was an increase in turnover of spines that began just before (~2 weeks)

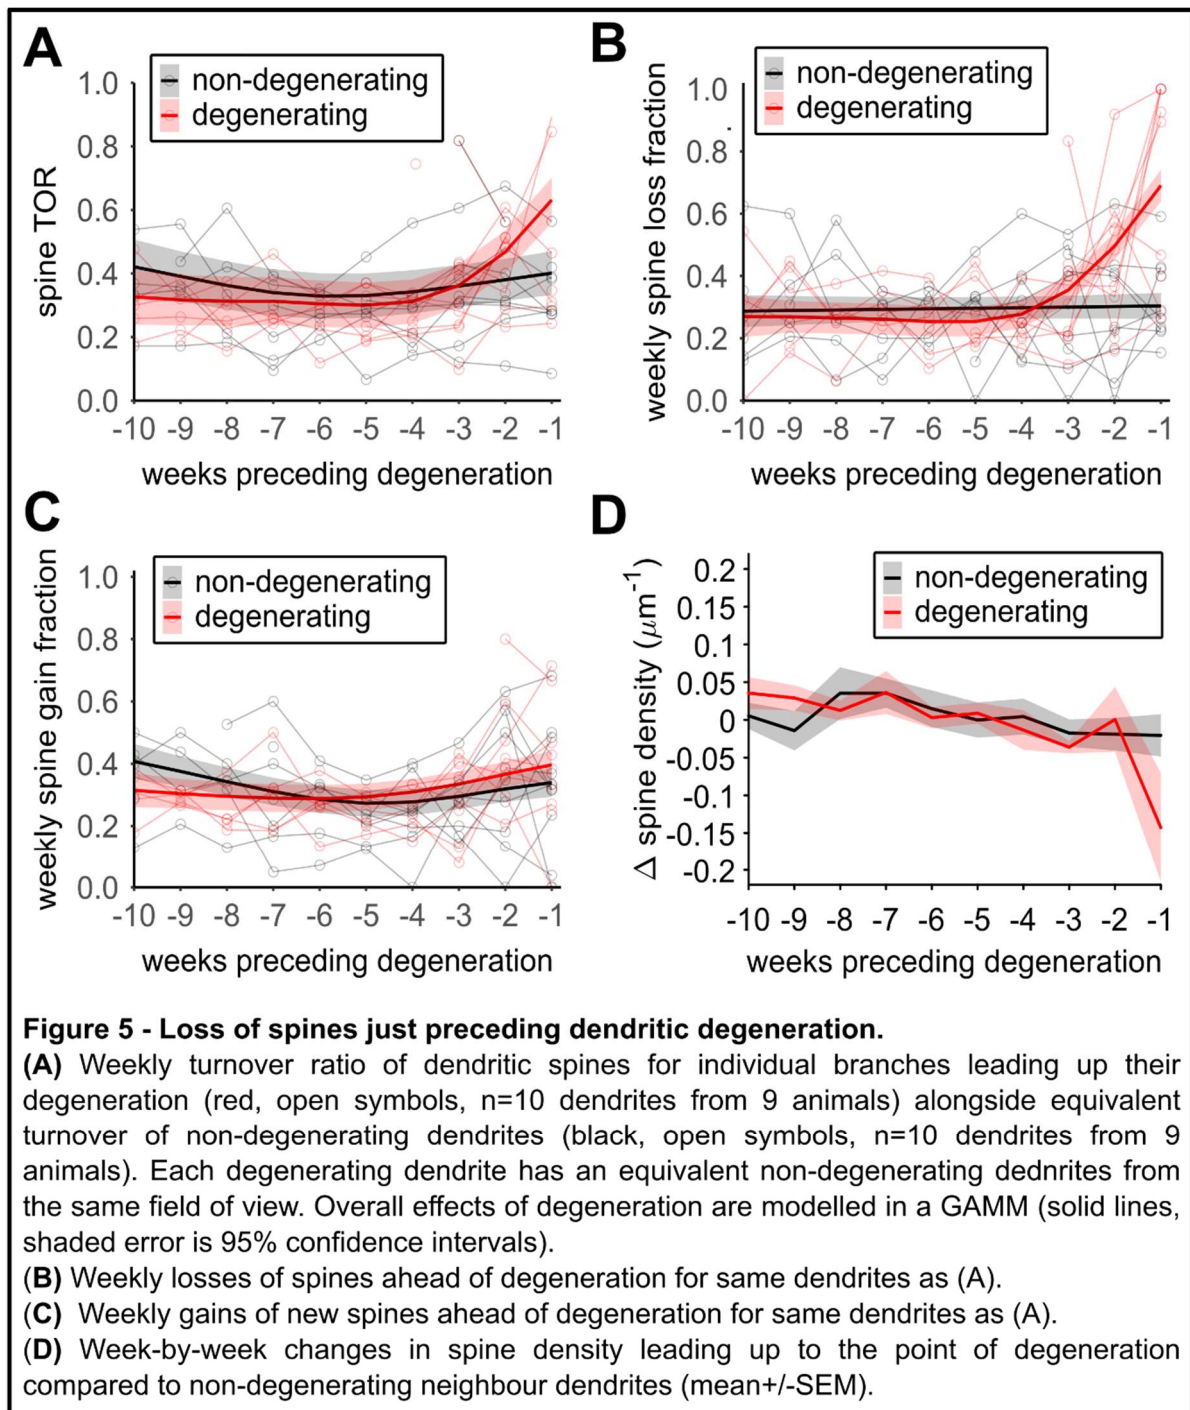

345 dendritic degeneration (Figure 5A). This contrasts with non-degenerating dendrites, which  
346 maintained stable spine turnover levels through this period. The increase in turnover was driven  
347 exclusively by a large increase in the number of spines being lost in the period just preceding  
348 dendrite loss (Figure 5B). Indeed, several dendrites lost close to 100% of their existing spines  
349 in the week or two before their disappearance. In contrast, the rate of addition of new spines  
350 (gains) was maintained during this period (Figure 5C). To assess the effect of this imbalance  
351 in gains and losses on spine numbers, we measured the week-to-week changes in spine density  
352 (Figure 5D). These data show that there is an acute and rapid loss of synaptic structures in  
353 dendrites that immediately precedes death of that dendrite (Figure 5D; repeated measures  
354 ANOVA:  $F(11,55)=4.01$ ,  $p=0.001$  for time-degeneration interaction; post-hoc Tukey: week -1  
355 non-degenerating vs degenerating,  $p = 0.03$ ).

### 356 Presynaptic bouton turnover is suppressed progressively ahead of axon degeneration

357 Next, in a similar way, we assessed structural plasticity of TBs in degenerating and matched  
358 non-degenerating axons (Figure 6). We found strikingly different effects in axons compared to  
359 dendrites. Whereas in dendrites, the spine dynamics were increased in the week or two before  
360 degeneration (Figure 5A), the rate of presynaptic bouton turnover starts to decrease ~2 months  
361 ahead of axon loss, maintaining a steady decline up to the point of degeneration (Figure 6A;  
362 GAMM based on 18 axons from 7 animals). Turnover rates in non-degenerating axons is  
363 relatively stable during the same period (Figure 6A). This reduced TB turnover in degenerating  
364 axons is driven by a decrease in both loss (Figure 6B) and addition (Figure 6C) of boutons.  
365 This suggests that presynaptic structures display chronic over-stabilisation in axons that go on  
366 to degenerate. Since there is a decrease in the rate of emergence of new TBs and the loss of  
367 existing ones, it is perhaps not surprising that there were no clear week-by-week changes in the  
368 TB density leading up to degeneration (Figure 6D; repeated measures ANOVA:  $F(11,22)=1.01$ ,  
369  $p=0.47$ ). As such, it appears that, in contrast to dendrites that undergo dramatic synaptic losses

370 just ahead of degeneration, axons are predominantly characterised by a progressive denigration  
 371 of structural plasticity that starts many weeks before they die.

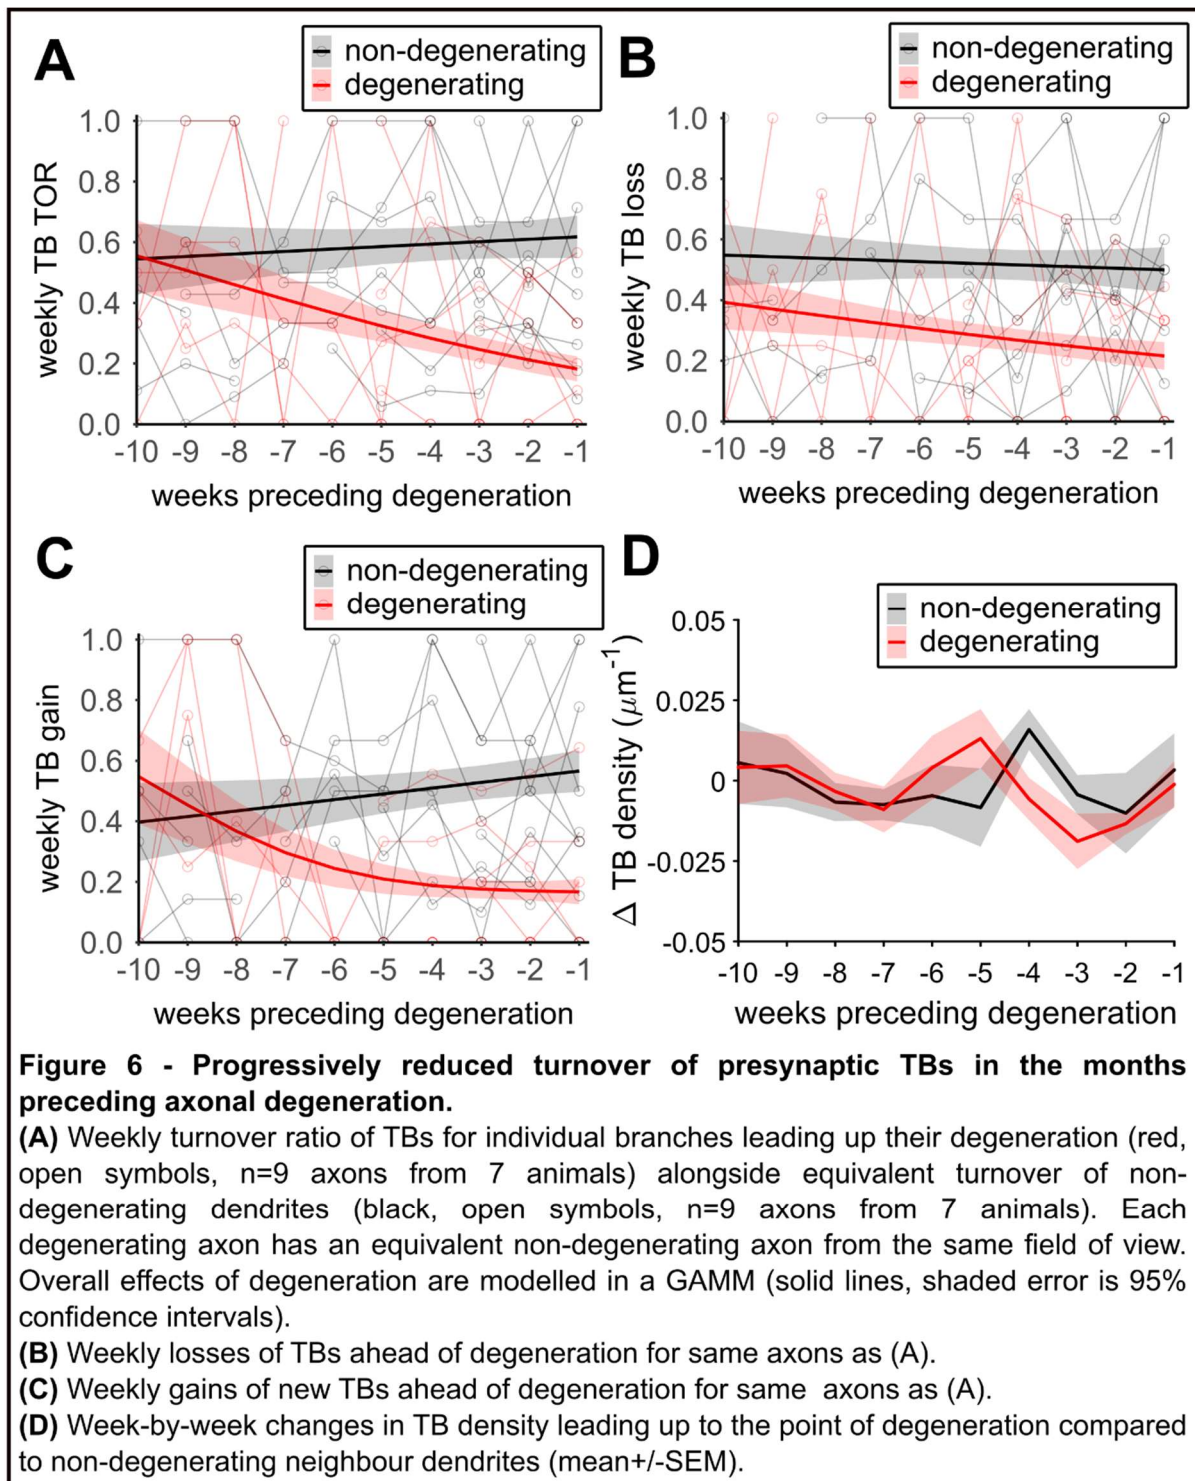

372

## 373 Discussion

374 By repeatedly imaging large numbers of axons and dendrites each week over months, we  
375 have shown that tauopathy-driven degeneration of the parent axon or dendrite is associated  
376 with aberrant turnover of synapses in the weeks leading up to its death (Figures 4&5). Our  
377 longitudinal approach to imaging of individual axons and dendrites shows that there is a huge  
378 diversity of effects of tauopathy at varying times in different cells. Overall, as predicted from  
379 previous cross-sectional measurements of synapse density in rTg4510 animals (Crimins et al.,  
380 2012; Jackson et al., 2017; Kopeikina et al., 2013), we found that the density of both  
381 presynaptic TB and postsynaptic dendritic spines is decreased as the pathology progresses  
382 (Figures 1&2). These decreases in overall synapse density are driven partly, but not  
383 exclusively, by degeneration of dendrites and axons is distributed widely across the time-course  
384 of disease. Despite the widely varying times of degeneration, our tracking of individual neurites  
385 allowed us to retrospectively measure their properties as they approached their death and  
386 compare them to healthy neighbouring cells. We found that neurite degeneration is preceded by  
387 aberrant structural synaptic plasticity in a cell-specific way that is markedly different in  
388 dendrites and axons.

389 In many degenerating dendrites, there is a dramatic loss of dendritic spines in the week or  
390 two before they disappear (Figure 5). This suggests that there is a rather rapid final decline in  
391 dendritic functional integrity just before tau-driven degeneration. We did observe some classic  
392 signs of pathology, such as swelling or blebbing, in a minority of degenerating dendrites, but  
393 these signs were only ever manifested in the 2-3 weeks before dendrite loss (Figure 4). Indeed,  
394 most dendrites that were lost did not show these classic pathological symptoms before  
395 degeneration. It is possible that the timing of our imaging means that we missed the emergence  
396 of pathology. However, our weekly imaging interval means that, if we did miss blebbing or  
397 swelling, it must have only occurred in the a few days before dendritic destruction. Retraction,

398 growth or partial loss of dendrites was extremely rare in rTg4510s and was never observed in  
399 WT animals, suggesting that the entire dendrite is lost at once. These rapid and complete losses  
400 of a specific dendrite within a field of view could well be linked to death of the parent neuron.  
401 A similar dendritic degeneration phenomenon has been observed in the 3xTg-AD mouse line,  
402 which expresses amyloid and tau pathological mechanisms (Bittner et al., 2010). In that study,  
403 cortical neuronal loss, and associated dendritic degeneration, occurred early in pathological  
404 progression, prior to detection of plaques or NFTs (Bittner et al., 2010). However, both diffuse  
405 amyloid and phosphorylated tau have been detected at these early stages in the cortex of the  
406 3xTg-AD mouse (Cai et al., 2012), which leaves open the possibility that either or both drive  
407 the observed neuronal loss. Notably, many mouse models of amyloidosis do not exhibit cell  
408 death or neurite loss despite overt amyloid pathology, leaving tau more directly implicated in  
409 neuronal cell death (Lee and Han, 2013; Stephen et al., 2019). Intriguingly, some of the  
410 dendritic losses we observed in rTg4510s also occurred in relatively young animals, at a stage  
411 that precedes the major emergence of NFTs. Taken together, this would suggest that tau-based  
412 pathology can drive dendritic (and potentially, neuronal) degeneration independent of insoluble  
413 NFTs.

414 Axons also showed tau-dependent degeneration, with losses occurring across wide-ranging  
415 times, starting as early as 23 weeks old (Figure 4). Overall, more dendrites were lost than axons,  
416 aligning with the more severe dendritic synapse losses here (Figures 1 & 2) and previously  
417 observed (Jackson et al., 2017). However, as with dendrites, most of these axonal losses  
418 occurred without any overt signs of dystrophy in preceding weeks, although a minority did  
419 display blebbing ahead of degeneration (Figure 4). However, in contrast to dendrites, some  
420 axons did display plasticity of their backbone structure. Even in WT animals, we observed a  
421 small and balanced number of axonal retraction and growth events. In transgenic animals, no  
422 growth was observed but some axons did appear to retract. Even so, ~60% of axons that



423 disappeared seemed to have normal structure in the preceding imaging session, just one week  
424 before (Figure 4). This aligns with the idea that a majority of tauopathy-induced neurite  
425 disappearance is associated with acute loss of large sections of neurite, or perhaps the entire  
426 cell. Alternatively, however, the disappearance of axons from a field of view could be due to a  
427 relatively rapid “dying back” mechanism, which has been previously associated with  
428 neurodegenerative disease (Adalbert and Coleman, 2013; Kneynsberg et al., 2017), if the  
429 degenerating axons died back sufficiently rapidly that it occurred within the week-long period  
430 between imaging sessions. We detected relatively few “dying back” axons but, if this process  
431 is indeed rapid, then we may have needed much larger fields of view or more frequent imaging  
432 sessions to detect them.

433 The cell-autonomous nature of both dendritic and axonal degeneration is highlighted by the  
434 fact that each degenerating neurite was near other imaged neurites which showed no signs of  
435 pathology. Indeed, most of the imaged neurites in the rTg4510 animals survived the entire  
436 imaging time-course without degenerating. The low rates of detection of degenerating neurites  
437 (~1% per week) may seem counter-intuitive given the overt loss of cortical volume overall in  
438 rTg4510s (Santacruz et al., 2005)(Figure 3B), but these degeneration events are, of course,  
439 cumulative and therefore could add up to a substantial effect over time.

440 Reduction of tau expression has been suggested as potential therapeutic strategy for  
441 tauopathy-driven neurodegeneration. We tested the link between continued tau expression and  
442 neurodegeneration by dosing the rTg4510 animals with DOX starting at 18, 22, 26 and 30  
443 weeks of age. DOX reduced expression of mutant tau by ~50%, similarly in all treatment  
444 groups (Figure 4A). In line with other studies (Holmes et al., 2016; Wang et al., 2018), we  
445 found that the effect of reducing tau P301L expression on subsequent appearance of classical  
446 markers of tau pathology and neurodegeneration was dependent on when DOX administration  
447 was started. The earliest administration, at 18 weeks, reduced PG5 accumulation, ameliorated

448 cortical atrophy and partially rescued tau-induced reductions in synapse density (Figure 3B-  
449 G). However, there was no discernible beneficial effect if DOX was started after 22 weeks  
450 (Figure 3E). This confirms that there is a stage, relatively early in tauopathy, beyond which the  
451 progression of pathology will continue unabated even if the addition of aberrant tau is curtailed  
452 (Helboe et al., 2017). In line with the partial rescue of classical markers of pathology, DOX  
453 administration slowed, but did not stop, degeneration of individual axons and dendrites (Figure  
454 4A). A recent study has shown that there is disruption of off-target genes in the rTg4510  
455 animals at the site of transgene insertion (Gamache et al., 2019). It was suggested that this  
456 genetic disruption may drive rTg4510 pathology independent of tau (Gamache et al., 2019).  
457 The fact that DOX (and consequent reduction of tau P301L expression) did have an  
458 ameliorative effect at young ages in our study suggests that tau expression must be contributing  
459 to pathological progression at that stage (Figure 3&4). This aligns with previous studies that  
460 showed suppression of tau expression in rTg4510 animals from conception to various stages  
461 of adulthood, which effectively eliminates tau P301L effects but leaves other genetic disruption  
462 intact in the responder line, completely eliminates pathological progression until DOX is  
463 removed (Han et al., 2012; Yang, 2013; Hunsberger et al., 2014; Helboe et al., 2017). This  
464 suggests that tau P301L is the predominant driver of pathology. However, the lack of an  
465 available genetically-matched control leaves open the possibility in our experiments, and those  
466 of others (Helboe et al., 2017; Holmes et al., 2016; Wang et al., 2018), that the lack of DOX  
467 effect when administered later is because genetic factors other than tau contribute to later  
468 rTg4510 pathology.

469 Abnormal synapse function is a well-characterised phenomenon associated with tauopathy  
470 and other forms of neurodegenerative disease. Our longitudinal imaging allowed us to capture  
471 structural synaptic plasticity in axons and dendrites in the weeks leading up to their  
472 degeneration. This analysis revealed that degeneration is preceded by neurite-specific changes

473 in synapse plasticity. In dendrites, a reduction in synapse density in the 2 weeks ahead of  
474 degeneration is driven by a dramatic increase in the removal of spines. Loss of postsynaptic  
475 input may be an early symptom of the cellular pathology leading up to neuron death or may  
476 itself be a driver of degeneration. Indeed, synaptic weakening, and particularly long-term  
477 depression, have been associated with the development of pathology in several models of  
478 neurodegenerative disease, including rTg4510s (Crimins et al., 2012; Eckermann et al., 2007;  
479 Jackson et al., 2017; Thies and Mandelkow, 2007; Yoshiyama et al., 2007). Our data suggest  
480 that at least some of this synapse depression is very closely linked in time to dendrite  
481 degeneration. This short time window should shape the design of any intervention aimed at  
482 ameliorating degenerative pathology by normalising synaptic strength. Such an intervention  
483 should probably be targeted at halting the onset of synaptic depression rather than reversing it.  
484 Interestingly, even during the period of intense reduction in synapse density, new spines were  
485 still being added at a normal rate. This suggests that the mechanisms for creating new synapses  
486 are still functional as dendrites enter the final stages of cellular pathology.

487 Perhaps the most striking result from our studies is the fact that degeneration-associated  
488 synaptic plasticity in axons is very different from that in dendrites. There is a slowly  
489 progressive reduction in structural synaptic plasticity that emerges from approximately two  
490 months ahead of axon loss (Figure 6A). In stark contrast to the increased loss of dendritic  
491 spines, axons destined for degeneration actually undergo a reduced rate of synapse loss (Figure  
492 6B). These reduced losses do not, however, drive a dramatic increase in TB density because,  
493 along the same time-course, the addition of new TBs is also inhibited (Figure 6D). Overall, this  
494 may contribute to a slow attrition of presynaptic density because gains appear to be slighter  
495 more inhibited than losses. In fact, the gained fraction of axonal synapses drops to almost zero  
496 as the point of degeneration approaches. This suggests a scenario in which presynaptic sites  
497 become abnormally stable ahead of degeneration. The relative lack of plasticity may reflect an

498 inability of these cells to participate in the normal changes in neuronal connectivity that  
499 underlies ongoing brain function. Since turnover of synapses has been related to learning and  
500 memory formation, it is feasible that pathological synaptic over-stabilisation in axons could  
501 relate to cognitive symptoms associated with disease progression.

502 Our findings give weight to the idea that aberrant tau may exert pathological influence on  
503 synapses via different mechanisms in pre- and postsynaptic compartments. Under healthy  
504 physiological conditions, tau acts as microtubule-stabiliser within the axon (Goedert and  
505 Spillantini, 2011). Hyperphosphorylation of tau leads to dissociation from the microtubules,  
506 decreasing their stability. Microtubule instability has been shown to negatively impact axon  
507 structure and fast axonal transport of cellular organelles, which could impact presynaptic  
508 structural plasticity. Furthermore, direct interaction of hyperphosphorylated tau with  
509 presynaptic vesicles was shown to mediate aberrant synaptic function (Zhou et al., 2017),  
510 which could impact plasticity. It is possible that over-stabilisation of presynaptic sites plays a  
511 role in driving subsequent axon degeneration. The relatively prolonged period of aberrant  
512 plasticity before degeneration opens a potential window of opportunity to test whether rescue  
513 of plasticity defects may have ameliorative benefits for axons. In contrast to axons, tau is not  
514 usually found within dendrites, but it is mis-targeted there following its hyperphosphorylation  
515 (Zempel and Mandelkow, 2014). This pathological tau is thought to mediate postsynaptic  
516 abnormalities by modulating Fyn kinase activity that impacts NMDA receptors (Ittner et al.,  
517 2010). Given the important role of NMDA receptors in triggering various forms of synaptic  
518 plasticity as well as cell death pathways (Amadoro et al., 2006; Hardingham and Bading, 2010),  
519 it is tempting to suggest that this mechanism may be involved in the degeneration-associated  
520 changes in dendrite plasticity described here.

521 We anticipate that there are synaptic connections between the cortical cells within the  
522 population that were labelled in this study, which raises the question of how such different

523 plasticity dynamics on either side of the synapse can be reconciled. Opposite shifts in dynamics  
524 of synapse turnover could represent compensatory mechanisms for what is happening on the  
525 other side of the synapse, or perhaps in response to sudden loss of synaptic partners due to cell  
526 death. It will be important to image locations where labelled axons and dendrites make  
527 synapses with each other to directly assess the interplay between the differential pathological  
528 dynamics of pre- and postsynaptic compartments as they undergo degeneration.

## 529 Methods

### 530 Animals

531 The rTg4510 mice line expresses a reversible transgene expressing the 4R0N tau isoform  
532 with the P301L mutation under control of doxycycline (DOX)-dependent promoter (Santacruz  
533 et al., 2005). Verification of genotypes were assessed by a standardized PCR assay for activator  
534 and responder transgenes (Santacruz et al., 2005). We compared groups of animals; wild-type  
535 (WT) littermates, rTg4510 animals given vehicle and rTg4510 animals given DOX. Animals  
536 were randomly allocated to four batches in which imaging was started at differing ages (20, 24,  
537 28 and 32 weeks). There were 5 animals in each group within each batch, for a total of 60  
538 animals. To turn off transgene expression, doxycycline was administered through an initial oral  
539 bolus (10mg/kg) following cranial window surgery; mice were then fed a doxycycline-  
540 containing diet (200 mg/kg of dietary chow) throughout the imaging period. All mice were  
541 given ad libitum access to food and water and maintained in a 12-hour light-dark cycle. All  
542 procedures were conducted by researchers holding a UK personal licence and conducted in  
543 accordance with the UK Animals (Scientific Procedures) Act 1986, and subject to internal  
544 ethical review. All experiments and analyses were completed blind to genotype or treatment  
545 group.

### 546 Surgery

547 Two surgeries were performed on each animal. In the first surgery, performed when animals  
548 were aged between 15-17 weeks under 1.5% (v/v) isoflurane induced anaesthesia, an adeno-  
549 associated virus (AAV) serotype 2 expressing GFP ( $10^{10}$  GU; Vector Biolabs) was injected into  
550 layer 2/3 (300 $\mu$ m below the dura) to enable visualisation of cortical neurons. Viral injections  
551 of 0.3 $\mu$ l per site, at three sites running approximately 1mm from and parallel to the midline  
552 were performed. Mice were given pre-operative intra-peritoneal injections of dexamethasone

553 (30 mg/kg) to reduce brain swelling and buprenorphine (5 mg/kg) for analgesia. Performing  
554 these viral infections at an early, well-defined pre-degenerative age ensures that similar  
555 population of neurons is infected in all animals. Mice were allowed to recover for at least 2  
556 weeks before the second surgery in which a cranial window was implanted to allow *in vivo*  
557 imaging. The cranial window was implanted 2 weeks ahead of the first imaging session.  
558 Therefore, this surgery was performed at different ages for the four different batches of animals  
559 (18, 22, 26 and 30 weeks). Alignment of window implantation with imaging age maximised  
560 the utility of the cranial window for the target imaging ages in each batch. Mice were again  
561 given pre-operative intra-peritoneal injections of dexamethasone (30 mg/kg) to reduce brain  
562 swelling and buprenorphine (5 mg/kg) for analgesia. For window implantation, under 1.5%  
563 (v/v) isoflurane induced anaesthesia, the skull was exposed and a 4-5mm diameter section  
564 overlying the somatosensory cortex was removed (AP +1.4, ML -3.0). A 5mm glass coverslip  
565 was placed over the craniotomy and sealed with glue and dental cement containing gentamicin.  
566 A metal screw was implanted on the contralateral skull to aid window stability. Further dental  
567 cement was then added over the remaining exposed skull, and a stainless-steel bar (<500 mg)  
568 implanted on to the anterior contralateral window to enable accurate positioning on the two-  
569 photon microscope. Mice were left to recover for at least 2 weeks prior to the first imaging  
570 session.

### 571 **Longitudinal imaging**

572 Longitudinal two-photon imaging was performed as previously described (Jackson et al.,  
573 2017). Animals were imaged weekly starting at 20, 24, 28 and 32 weeks for each batch.  
574 Staggering the onset of imaging allowed coverage of ages prior to and throughout widespread  
575 cortical pathology. A two-photon microscope (Prairie Technologies) equipped with a tuneable  
576 Ti:Sapphire pulsed laser (~100 fs pulsewidth, MaiTai HP, SpectraPhysics) and PrairieView  
577 acquisition software was used for all imaging experiments. For each imaging session mice were

578 positioned and secured on the microscope stage via the implanted steel head bar. Mice were  
579 maintained under anaesthesia throughout imaging with 3-5% isoflurane. The body temperature  
580 was measured and maintained above 35°C using a rectal probe and heating blanket. Lacri-lube  
581 was added to the eyes to stop them from drying out. A 10x objective (NA=0.3, Olympus) was  
582 used to identify superficial blood vessels as fiducial markers, enabling the relocation of regions  
583 of interest (ROIs). A 40x water immersion objective (LUMPlanFI/IR, NA=0.8, Olympus) was  
584 then used to acquire Z-stacks of each ROI (75  $\mu\text{m}$  x 75  $\mu\text{m}$ , 512 x 512 pixels, step size = 0.5  
585  $\mu\text{m}$ ) per animal. Excitation power at 910 nm was kept below 35mW at the sample to avoid  
586 phototoxicity. GFP emission was collected through a 525/25nm filter. Initially 5-10 ROIs  
587 containing neurites were chosen and images acquired ensuring ROIs were separated by at least  
588 100 $\mu\text{m}$ . In each subsequent imaging session, each ROI was relocated and imaged for up to 26  
589 sessions. There were no differences between genotypes in image signal-to-noise ratio,  
590 measured by mean:standard deviation of the upper 15<sup>th</sup> percentile of pixel intensity values.  
591 Animals were removed from subsequent imaging sessions if there was significant clouding of  
592 the cranial window that made it impossible to re-locate and/or visualise neurites. After the final  
593 imaging session, each animal was sacrificed by cardiac perfusion with 4% paraformaldehyde.

#### 594 Spine and terminaux bouton structure analysis

595 *In vivo* two-photon images were converted into stacks with ImageJ (National Institutes of  
596 Health) and the registered in XY using the StackReg plugin to account for any movement or  
597 drift during imaging (Thevenaz et al., 1998). The stacks were deconvolved with Huygens  
598 Deconvolution software (Scientific Volume Imaging) using a quick maximum likelihood  
599 estimation with an experimentally defined point-spread-function. Each ROI Z-stack has all  
600 sessions aligned in 3D using “Least squares” landmark registration on MIPAV (National  
601 Institutes of Health). Aligned ROIs were then converted into a 4D hyper-stack (XYZT)  
602 enabling the optimal medium for spine and bouton analysis. Axons and dendrites were



603 distinguished by their morphology, with a straighter, thicker dendritic shaft vs tortuous thinner  
604 axonal process as described previously in the literature (De Paola et al., 2006; Majewska et al.,  
605 2006). All dendritic spines were counted, while only terminaux boutons were counted on  
606 axons. Synaptic components were counted manually following a ruleset from previous  
607 literature (Holtmaat and Svoboda, 2009; Jackson et al., 2017) using the Cell Counter plugin  
608 on ImageJ. Further data manipulation and analysis was carried out using MATLAB  
609 (Mathworks).

## 610 Histology

611 Perfused-fixed brains were coronally dissected into three segments using an adult mouse  
612 brain matrix (slot #5 and #11 AP; RBM-2000C: ASI Instruments, USA). These segments were  
613 processed using the Tissue TEK® VIP processor (GMI Inc, USA) and embedded in paraffin  
614 wax. The middle segment was used to cut 8 µm serial sections using rotary microtomes (HM  
615 200 and HM 355; Thermo Scientific, Germany) which were mounted on glass slides. Coronal  
616 sections representing approximately Bregma -1.50 (AP) were selected for  
617 immunohistochemistry using primary antibodies specific for phospho-tau (PG-5, tau  
618 phosphorylated at s409; 1:8000, from Peter Davies) and microglia (Iba-1: 1:6000, Wako  
619 Chemicals GmbH, Germany). Following de-paraffinisation and rehydration of the tissue,  
620 antigen retrieval was performed using the Lab Vision PT module system (Thermo Scientific,  
621 UK), where sections were heated to 100°C for 20 min in citrate buffer (TA-250-PM1X; Thermo  
622 Scientific, UK). After cooling in dH<sub>2</sub>O, the slides were transferred to the Lab Vision  
623 Autostainer 360 (Thermo Scientific, UK) where the following incubations were performed: 10  
624 min in H<sub>2</sub>O<sub>2</sub> (0.03%); 30 min in normal goat serum (1:20; Vector Laboratories, USA); 60 min  
625 in primary antibodies; 30 min in biotinylated goat anti-mouse or anti-rabbit IgG (1:200, PA-  
626 920 or BA-1000; Vector Laboratories, USA); 30 min avidin-biotin complex solution (PK-  
627 7100; Vector Laboratories, USA); 5 min in 3,3'- diaminobenzidine (SK-4105; Vector

628 Laboratories, USA). Apart from the last two steps, PBS with 0.05% Tween-20 (PBS-T) was  
629 used for diluting reagents and washes between steps. Sections were then counterstained with  
630 haematoxylin before dehydration and cover-slipping. Stained sections were digitised using the  
631 Scanscope XT slide scanner (Aperio, USA) at 20× magnification. Imagescope software  
632 (version 11.1.2.760; Aperio, USA) was used to view the digitised tissue sections and delineate  
633 boundaries of the hippocampus and overlying cortex (including barrel field of the  
634 somatosensory cortex) for both the right (cranial window) and left (contralateral) side of brain.  
635 Immunoreactivity for PG-5 positive tau pathology and Iba-1 positive microglia within the  
636 regions of interest was quantified using the positive pixel algorithm (Imagescope, version  
637 11.1.2.760; Aperio, CA, USA) and expressed as a percentage of the total area.

#### 638 [Quantitative reverse transcription PCR](#)

639 Expression of transgenic tau was analysed by reverse transcription quantitative PCR using  
640 post-mortem fixed cortical samples from individual brains as previously described (Blackmore  
641 et al., 2017). Data were analysed using the  $\Delta\Delta C_t$  method using GAPDH as the reference gene  
642 and were normalised to a known untreated rTg4510-positive sample from late stage pathology.  
643 Of note, one animal genotyped as WT by conventional PCR, showed mildly (27% of rTg4510  
644 standard) elevated tau P301L level by quantitative PCR. However, this animal showed WT  
645 levels of PG5 and IBA-1 staining and normal brain weight. Therefore, we assumed an  
646 unexplained error in quantitative PCR in this sample, and retained this animal as WT genotype.

#### 647 [Statistical analysis](#)

648 Generalized Additive Mixed Models (GAMMs) were used to assess any changes in synapse  
649 density or dynamics over time (Figures 1,2,5&6). GAMMs extend typical regression methods  
650 to estimate the relationship between a dependent variable (e.g. spine density) and specified  
651 predictors (e.g. genotype, age, animal, batch)(van Rij et al., 2019; Shadish et al., 2014; Wood,

2017). This relationship is modelled based on a smooth function rather than a typical linear regression. As such, it allows deviation from a linear relationship between predictors and dependent variables, which is potentially important because effects of neurodegeneration may vary between neurons at different stages of disease. Furthermore, the influence of repeated measures from individual animals and multiple neurites (likely neurons) within each animal, as well as different batches, can be included as random effects. Also, unlike repeated measures ANOVAs, GAMMs allow us to incorporate data from individual subjects at different (not necessarily matching) timepoints. This is important because of the varying time-course of imaging in different animals, the fact that some neurites degenerate (and therefore no longer contribute to population density) and because there were a few occasions when image sessions were lost for technical reasons (e.g. imaging system or anaesthesia complications). GAMMs were fitted using gam function of the *mgcv* package in R (Wood, 2017). Changes in mean synapse density over time were fitted using the general form:

$$\text{synapse property} \sim s(\text{age, by group}) + \text{group} + (I|\text{individual\_neurite,age}) + (I|\text{individual\_neurite}) + (I|\text{animal,week}) + (I|\text{batch,group})$$

The smoothing spline (*s*) fitted over *age* individually for each *group* (i.e. genotype or degenerating/not degenerating) with no prespecified number of smoothing knots (since the trajectory across time was not known *a priori*). Variability associated with repeated measures of individual *neurites*, *animals* and *batch* over *age* were included as random effects. GAMMs for spine properties were fitted to Tweedie distributions to account for occasions when they fell to zero (Supplementary Figure 1A). GAMMs for TB density was fitted to a Gaussian distribution (Supplementary Figure 1C) and TB turnover properties were fit using a beta distribution. Choice of the modelled distribution (and link function) was based on subjective assessment of linearity of QQ-plots and maximising deviance explained by the model (Supplementary Figure 1B&D).

677 Histological and qPCR data was assessed via ANOVA followed by Tukey post-hoc testing  
678 when a significant effect ( $P < 0.05$ ) was found. Neurite survival was analysed by Kaplan-Meier  
679 curves and differences between genotypes tested using log-rank tests.

## 680 Author contributions

681 JDJ, JSJ, MLH, JI, MCA and MJO designed the study; JDJ and JSJ conducted the 2-photon  
682 imaging and image analysis; SM and ZA conducted the histology and analysis; TM coordinated  
683 and managed transgenic animals; JDJ, JSJ and MCA conducted data analysis; MF advised and  
684 conducted statistical analyses. All authors contributed to the manuscript preparation.

## 685 Acknowledgements

686 This work was funded by Eli Lilly and Co. JDJ was funded by a BBSRC-CASE PhD  
687 studentship (1370828). MCA's laboratory was funded by the Medical Research Council  
688 (MR/J013188/1) and EUFP17 Marie Curie Actions (PCIG10-GA-2011-303680).

689

690 **Supplementary Material**

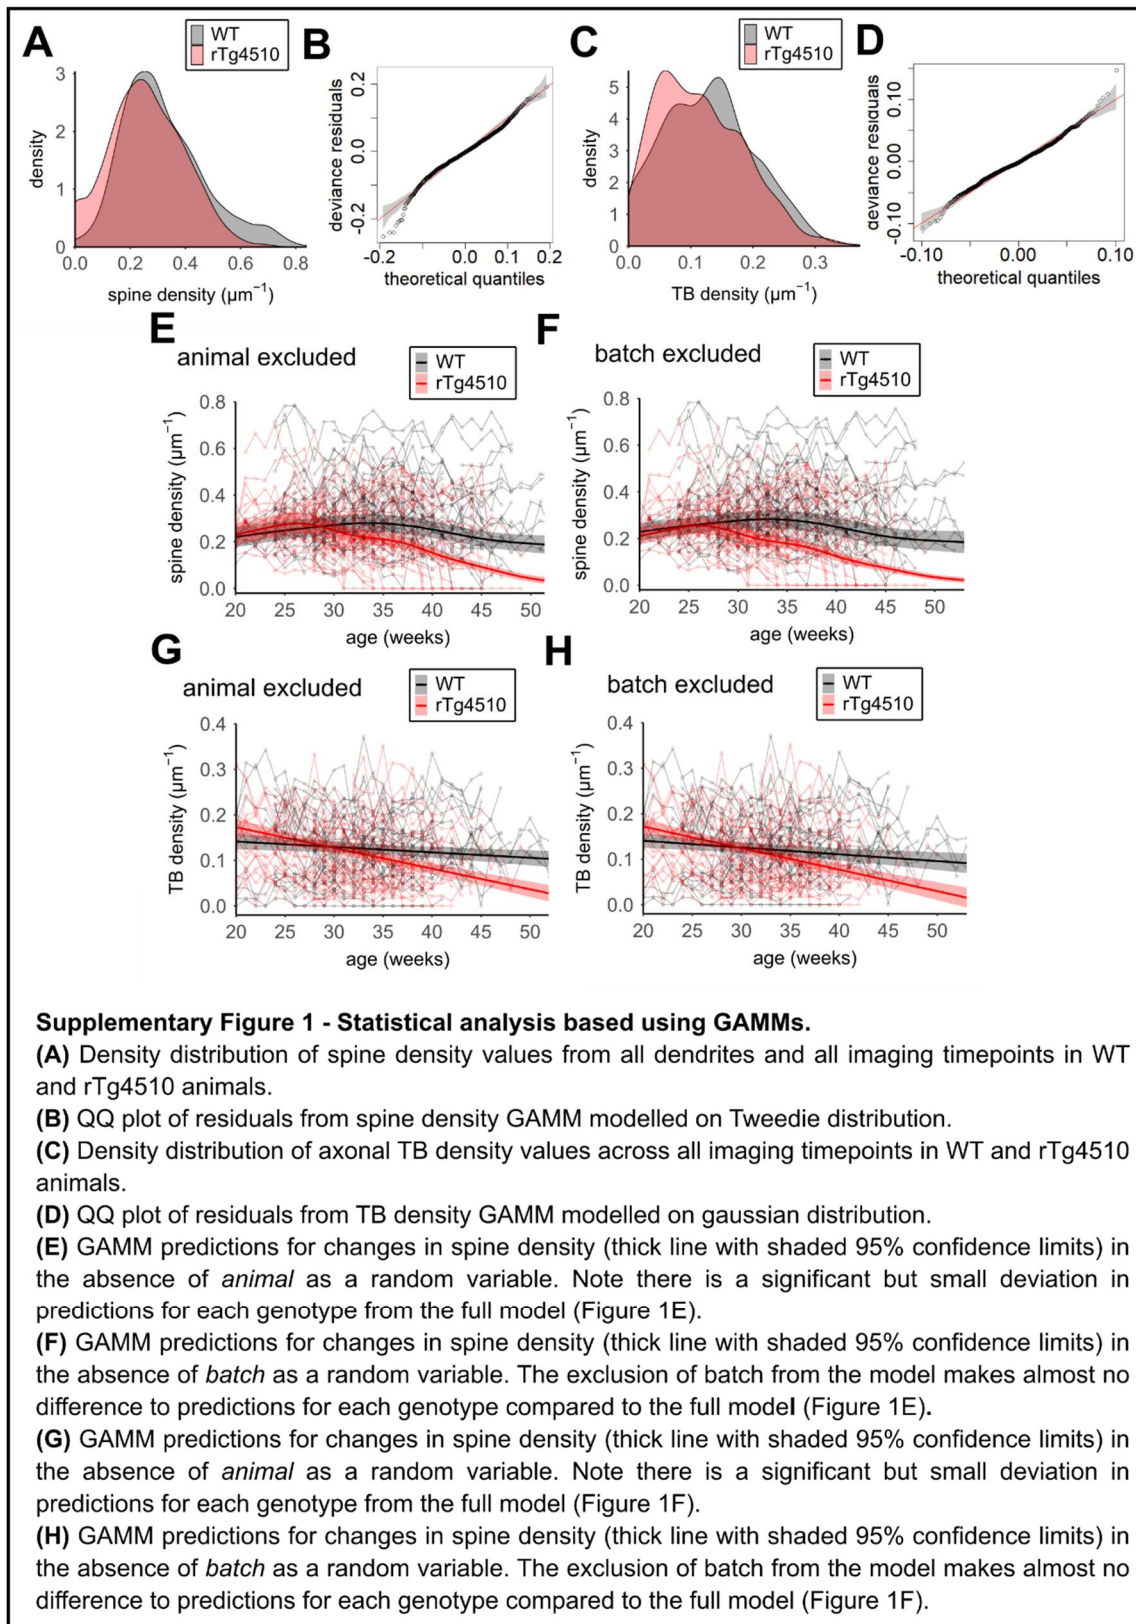

691

692

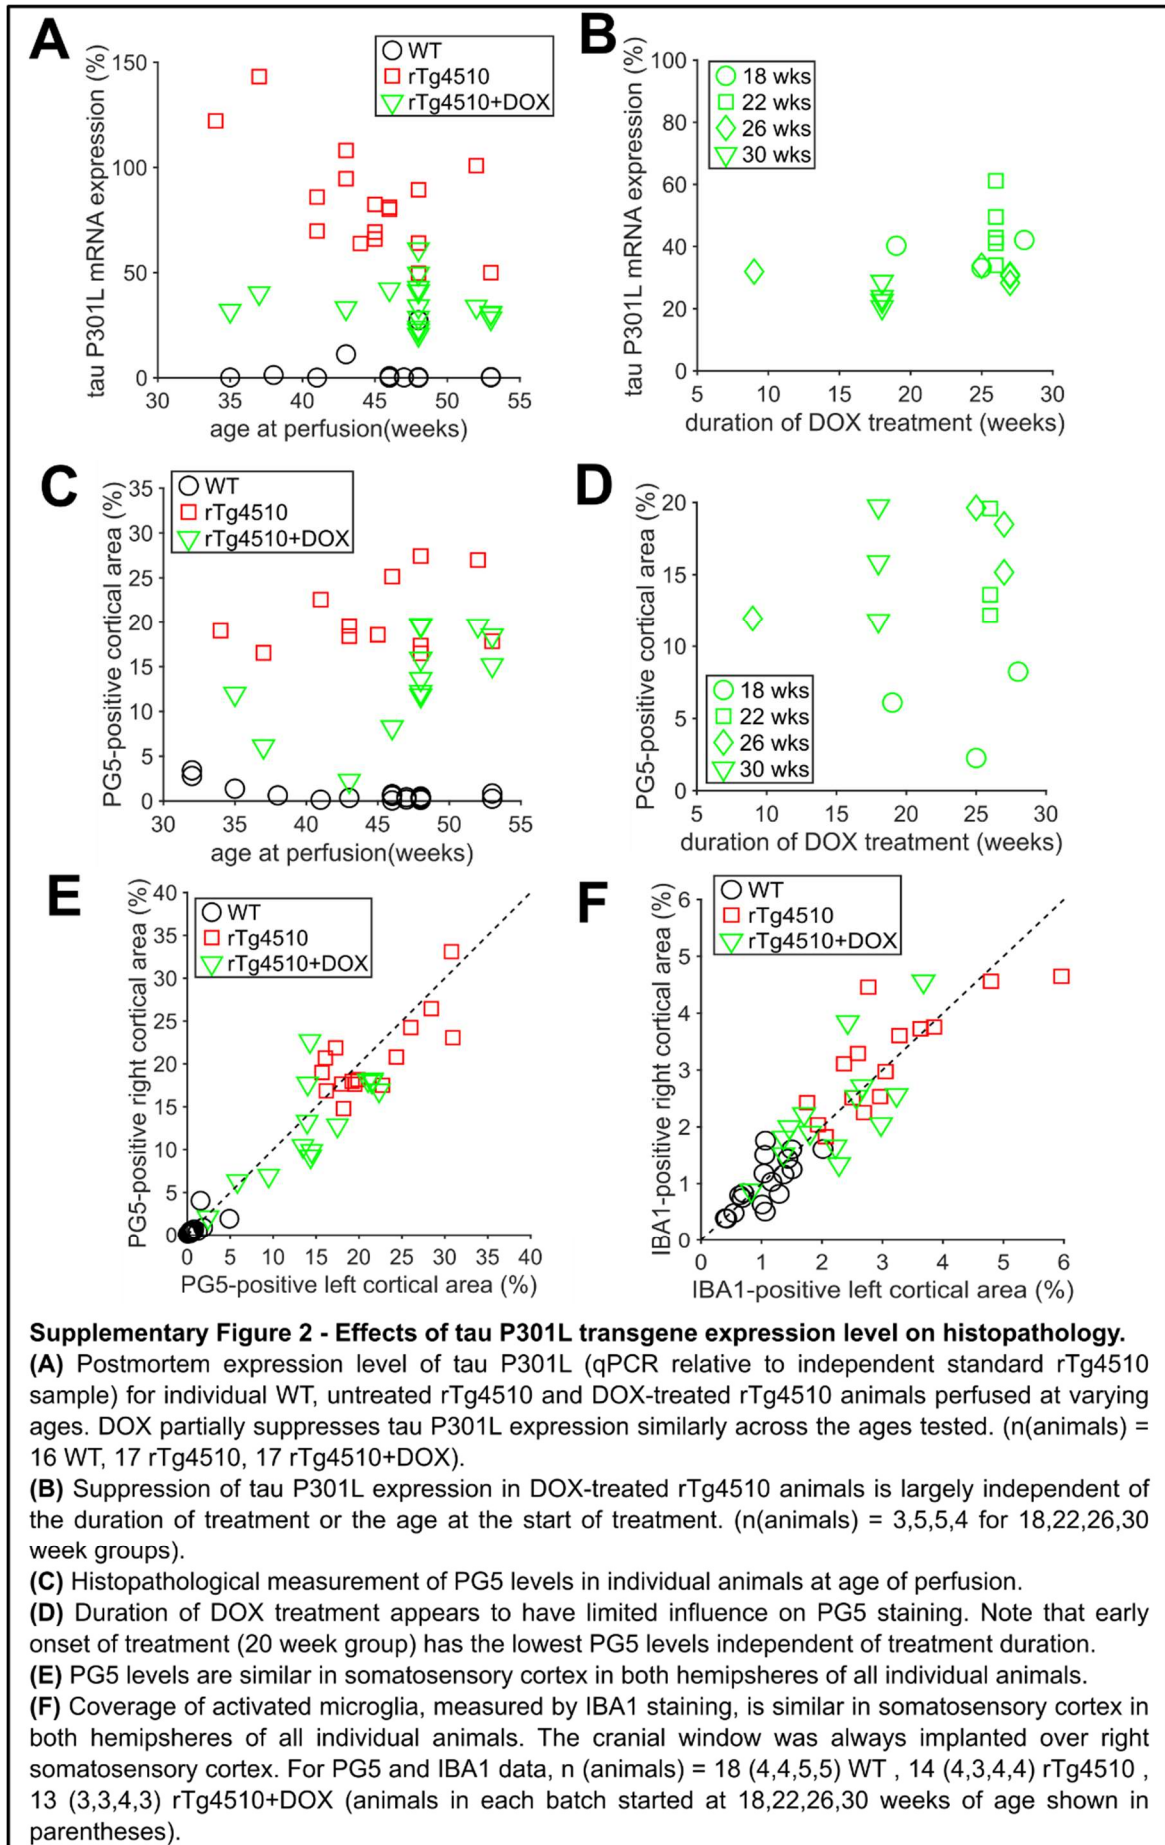





## 695 References

- 696 Adalbert, R., and Coleman, M.P. (2013). Review: Axon pathology in age-related  
697 neurodegenerative disorders. *Neuropathol. Appl. Neurobiol.* *39*, 90–108.
- 698 Amadoro, G., Ciotti, M.T., Costanzi, M., Cestari, V., Calissano, P., and Canu, N. (2006).  
699 NMDA receptor mediates tau-induced neurotoxicity by calpain and ERK/MAPK activation.  
700 *Proc. Natl. Acad. Sci.* *103*, 2898–2897.
- 701 Bittner, T., Fuhrmann, M., Burgold, S., Ochs, S.M., Hoffmann, N., Mitteregger, G.,  
702 Kretzschmar, H., LaFerla, F.M., and Herms, J. (2010). Multiple Events Lead to Dendritic Spine  
703 Loss in Triple Transgenic Alzheimer’s Disease Mice. *PLoS ONE* *5*, e15477.
- 704 Blackmore, T., Meftah, S., Murray, T.K., Craig, P.J., Blockeel, A., Phillips, K., Eastwood, B.,  
705 O’Neill, M.J., Marston, H., Ahmed, Z., et al. (2017). Tracking progressive pathological and  
706 functional decline in the rTg4510 mouse model of tauopathy. *Alzheimers Res. Ther.* *9*, 77.
- 707 Booth, C.A., Witton, J., Nowacki, J., Tsaneva-Atanasova, K., Jones, M.W., Randall, A.D., and  
708 Brown, J.T. (2016). Altered Intrinsic Pyramidal Neuron Properties and Pathway-Specific  
709 Synaptic Dysfunction Underlie Aberrant Hippocampal Network Function in a Mouse Model  
710 of Tauopathy. *J. Neurosci.* *36*, 350–363.
- 711 Cai, Y., Zhang, X.-M., Macklin, L.N., Cai, H., Luo, X.-G., Oddo, S., LaFerla, F.M., Struble,  
712 R.G., Rose, G.M., Patrylo, P.R., et al. (2012). BACE1 Elevation is Involved in Amyloid Plaque  
713 Development in the Triple Transgenic Model of Alzheimer’s Disease: Differential A $\beta$   
714 Antibody Labeling of Early-Onset Axon Terminal Pathology. *Neurotox. Res.* *21*, 160–174.
- 715 Crimins, J.L., Rocher, A.B., and Luebke, J.I. (2012). Electrophysiological changes precede  
716 morphological changes to frontal cortical pyramidal neurons in the rTg4510 mouse model of  
717 progressive tauopathy. *Acta Neuropathol. (Berl.)* *124*, 777–795.
- 718 Eckermann, K., Mocanu, M.-M., Khlistunova, I., Biernat, J., Nissen, A., Hofmann, A.,  
719 Schönig, K., Bujard, H., Haemisch, A., Mandelkow, E., et al. (2007). The  $\beta$ -Propensity of Tau  
720 Determines Aggregation and Synaptic Loss in Inducible Mouse Models of Tauopathy. *J. Biol.*  
721 *Chem.* *282*, 31755–31765.
- 722 Forner, S., Baglietto-Vargas, D., Martini, A.C., Trujillo-Estrada, L., and LaFerla, F.M. (2017).  
723 Synaptic Impairment in Alzheimer’s Disease: A Dysregulated Symphony. *Trends Neurosci.*  
724 *40*, 347–357.
- 725 Gamache, J., Benzow, K., Forster, C., Kemper, L., Hlynialuk, C., Furrow, E., Ashe, K.H., and  
726 Koob, M.D. (2019). Factors other than hTau overexpression that contribute to tauopathy-like  
727 phenotype in rTg4510 mice. *Nat. Commun.* *10*, 2479.
- 728 Gendron, T.F., and Petrucelli, L. (2009). The role of tau in neurodegeneration. *Mol.*  
729 *Neurodegener.* *4*, 13.
- 730 Goedert, M., and Spillantini, M.G. (2011). Pathogenesis of the tauopathies. *J. Mol. Neurosci.*  
731 *MN* *45*, 425–431.

- 732 Grutzendler, J., Kasthuri, N., and Gan, W.-B. (2002). Long-term dendritic spine stability in the  
733 adult cortex. *Nature* 420, 812–816.
- 734 Han, H.J., Allen, C.C., Buchovecky, C.M., Yetman, M.J., Born, H.A., Marin, M.A., Rodgers,  
735 S.P., Song, B.J., Lu, H.-C., Justice, M.J., et al. (2012). Strain Background Influences  
736 Neurotoxicity and Behavioral Abnormalities in Mice Expressing the Tetracycline  
737 Transactivator. *J. Neurosci.* 32, 10574–10586.
- 738 Hardingham, G.E., and Bading, H. (2010). Synaptic versus extrasynaptic NMDA receptor  
739 signalling: implications for neurodegenerative disorders. *Nat. Rev. Neurosci.* 11, 682–696.
- 740 Harris, J.A., Koyama, A., Maeda, S., Ho, K., Devidze, N., Dubal, D.B., Yu, G.-Q., Masliah,  
741 E., and Mucke, L. (2012). Human P301L-Mutant Tau Expression in Mouse Entorhinal-  
742 Hippocampal Network Causes Tau Aggregation and Presynaptic Pathology but No Cognitive  
743 Deficits. *PLOS ONE* 7, e45881.
- 744 Helboe, L., Egebjerg, J., Barkholt, P., and Volbracht, C. (2017). Early depletion of CA1  
745 neurons and late neurodegeneration in a mouse tauopathy model. *Brain Res.* 1665, 22–35.
- 746 Herms, J., and Dorostkar, M.M. (2016). Dendritic Spine Pathology in Neurodegenerative  
747 Diseases. *Annu. Rev. Pathol. Mech. Dis.* 11, 221–250.
- 748 Holmes, H.E., Colgan, N., Ismail, O., Ma, D., Powell, N.M., O’Callaghan, J.M., Harrison, I.F.,  
749 Johnson, R.A., Murray, T.K., Ahmed, Z., et al. (2016). Imaging the accumulation and  
750 suppression of tau pathology using multiparametric MRI. *Neurobiol. Aging* 39, 184–194.
- 751 Holtmaat, A., Bonhoeffer, T., Chow, D.K., Chuckowree, J., De Paola, V., Hofer, S.B.,  
752 Hübener, M., Keck, T., Knott, G., Lee, W.-C.A., et al. (2009). Long-term, high-resolution  
753 imaging in the mouse neocortex through a chronic cranial window. *Nat. Protoc.* 4, 1128–1144.
- 754 Hoover, B.R., Reed, M.N., Su, J., Penrod, R.D., Kotilinek, L.A., Grant, M.K., Pitstick, R.,  
755 Carlson, G.A., Lanier, L.M., Yuan, L.-L., et al. (2010). Tau Mislocalization to Dendritic Spines  
756 Mediates Synaptic Dysfunction Independently of Neurodegeneration. *Neuron* 68, 1067–1081.
- 757 Hunsberger, H.C., Rudy, C.C., Weitzner, D.S., Zhang, C., Tosto, D.E., Knowlan, K., Xu, Y.,  
758 and Reed, M.N. (2014). Effect size of memory deficits in mice with adult-onset P301L tau  
759 expression. *Behav. Brain Res.* 272, 181–195.
- 760 Hunsberger, H.C., Rudy, C.C., Batten, S.R., Gerhardt, G.A., and Reed, M.N. (2015). P301L  
761 tau expression affects glutamate release and clearance in the hippocampal trisynaptic pathway.  
762 *J. Neurochem.* 132, 169–182.
- 763 Ittner, A., and Ittner, L.M. (2018). Dendritic Tau in Alzheimer’s Disease. *Neuron* 99, 13–27.
- 764 Ittner, L.M., Ke, Y.D., Delerue, F., Bi, M., Gladbach, A., Eersel, J. van, Wölfing, H., Chieng,  
765 B.C., Christie, M.J., Napier, I.A., et al. (2010). Dendritic Function of Tau Mediates Amyloid-  
766  $\beta$  Toxicity in Alzheimer’s Disease Mouse Models. *Cell* 142, 387–397.
- 767 Jackson, J., Jambrina, E., Li, J., Marston, H., Menzies, F., Phillips, K., and Gilmour, G. (2019).  
768 Targeting the Synapse in Alzheimer’s Disease. *Front. Neurosci.* 13.

- 769 Jackson, J.S., Witton, J., Johnson, J.D., Ahmed, Z., Ward, M., Randall, A.D., Hutton, M.L.,  
770 Isaac, J.T., O'Neill, M.J., and Ashby, M.C. (2017). Altered Synapse Stability in the Early  
771 Stages of Tauopathy. *Cell Rep.* 18, 3063–3068.
- 772 Kneynsberg, A., Combs, B., Christensen, K., Morfini, G., and Kanaan, N.M. (2017). Axonal  
773 Degeneration in Tauopathies: Disease Relevance and Underlying Mechanisms. *Front.*  
774 *Neurosci.* 11.
- 775 Kopeikina, K.J., Polydoro, M., Tai, H.-C., Yaeger, E., Carlson, G.A., Pitstick, R., Hyman, B.T.,  
776 and Spires-Jones, T.L. (2013). Synaptic alterations in the rTg4510 mouse model of tauopathy.  
777 *J. Comp. Neurol.* 521, 1334–1353.
- 778 Lee, J.-E., and Han, P.-L. (2013). An Update of Animal Models of Alzheimer Disease with a  
779 Reevaluation of Plaque Depositions. *Exp. Neurobiol.* 22, 84–95.
- 780 Menkes-Caspi, N., Yamin, H.G., Kellner, V., Spires-Jones, T.L., Cohen, D., and Stern, E.A.  
781 (2015). Pathological Tau Disrupts Ongoing Network Activity. *Neuron* 85, 959–966.
- 782 Miyamoto, T., Stein, L., Thomas, R., Djukic, B., Taneja, P., Knox, J., Vessel, K., and Mucke,  
783 L. (2017). Phosphorylation of tau at Y18, but not tau-fyn binding, is required for tau to  
784 modulate NMDA receptor-dependent excitotoxicity in primary neuronal culture. *Mol.*  
785 *Neurodegener.* 12, 41.
- 786 Mondragón-Rodríguez, S., Trillaud-Doppia, E., Dudilot, A., Bourgeois, C., Lauzon, M.,  
787 Leclerc, N., and Boehm, J. (2012). Interaction of Endogenous Tau Protein with Synaptic  
788 Proteins Is Regulated by N-Methyl-d-aspartate Receptor-dependent Tau Phosphorylation. *J.*  
789 *Biol. Chem.* 287, 32040–32053.
- 790 Mudher, A., Colin, M., Dujardin, S., Medina, M., Dewachter, I., Alavi Naini, S.M.,  
791 Mandelkow, E.-M., Mandelkow, E., Buée, L., Goedert, M., et al. (2017). What is the evidence  
792 that tau pathology spreads through prion-like propagation? *Acta Neuropathol. Commun.* 5, 99.
- 793 Nelson, P.T., Alafuzoff, I., Bigio, E.H., Bouras, C., Braak, H., Cairns, N.J., Castellani, R.J.,  
794 Crain, B.J., Davies, P., Del Tredici, K., et al. (2012). Correlation of Alzheimer disease  
795 neuropathologic changes with cognitive status: a review of the literature. *J. Neuropathol. Exp.*  
796 *Neurol.* 71, 362–381.
- 797 Pickett, E.K., Henstridge, C.M., Allison, E., Pitstick, R., Pooler, A., Wegmann, S., Carlson, G.,  
798 Hyman, B.T., and Spires-Jones, T.L. (2017). Spread of tau down neural circuits precedes  
799 synapse and neuronal loss in the rTgTauEC mouse model of early Alzheimer's disease.  
800 *Synapse* 71, n/a-n/a.
- 801 Polydoro, M., Acker, C.M., Duff, K., Castillo, P.E., and Davies, P. (2009). Age-Dependent  
802 Impairment of Cognitive and Synaptic Function in the htau Mouse Model of Tau Pathology. *J.*  
803 *Neurosci.* 29, 10741–10749.
- 804 Polydoro, M., Dzhala, V.I., Pooler, A.M., Nicholls, S.B., McKinney, A.P., Sanchez, L.,  
805 Pitstick, R., Carlson, G.A., Staley, K.J., Spires-Jones, T.L., et al. (2014). Soluble pathological  
806 tau in the entorhinal cortex leads to presynaptic deficits in an early Alzheimer's disease model.  
807 *Acta Neuropathol. (Berl.)* 127, 257–270.

- 808 Ramsden, M., Kotilinek, L., Forster, C., Paulson, J., McGowan, E., SantaCruz, K., Guimaraes,  
809 A., Yue, M., Lewis, J., Carlson, G., et al. (2005). Age-dependent neurofibrillary tangle  
810 formation, neuron loss, and memory impairment in a mouse model of human tauopathy  
811 (P301L). *J. Neurosci. Off. J. Soc. Neurosci.* 25, 10637–10647.
- 812 van Rij, J., Hendriks, P., van Rijn, H., Baayen, R.H., and Wood, S.N. (2019). Analyzing the  
813 Time Course of Pupillometric Data. *Trends Hear.* 23, 2331216519832483.
- 814 Rocher, A.B., Crimins, J.L., Amatrudo, J.M., Kinson, M.S., Todd-Brown, M.A., Lewis, J., and  
815 Luebke, J.I. (2010). Structural and functional changes in tau mutant mice neurons are not linked  
816 to the presence of NFTs. *Exp. Neurol.* 223, 385–393.
- 817 Rosenmann, H., Grigoriadis, N., Eldar-Levy, H., Avital, A., Rozenstein, L., Touloumi, O.,  
818 Behar, L., Ben-Hur, T., Avraham, Y., Berry, E., et al. (2008). A novel transgenic mouse  
819 expressing double mutant tau driven by its natural promoter exhibits tauopathy characteristics.  
820 *Exp. Neurol.* 212, 71–84.
- 821 Santacruz, K., Lewis, J., Spire, T., Paulson, J., Kotilinek, L., Ingelsson, M., Guimaraes, A.,  
822 DeTure, M., Ramsden, M., McGowan, E., et al. (2005). Tau suppression in a neurodegenerative  
823 mouse model improves memory function. *Science* 309, 476–481.
- 824 Scheff, S.W., Price, D.A., Schmitt, F.A., and Mufson, E.J. (2006). Hippocampal synaptic loss  
825 in early Alzheimer’s disease and mild cognitive impairment. *Neurobiol. Aging* 27, 1372–1384.
- 826 Selkoe, D.J. (2002). Alzheimer’s disease is a synaptic failure. *Science* 298, 789–791.
- 827 Shadish, W.R., Zuur, A.F., and Sullivan, K.J. (2014). Using generalized additive (mixed)  
828 models to analyze single case designs. *J. Sch. Psychol.* 52, 149–178.
- 829 Spire-Jones, T.L., and Hyman, B.T. (2014). The Intersection of Amyloid Beta and Tau at  
830 Synapses in Alzheimer’s Disease. *Neuron* 82, 756–771.
- 831 Stephen, T.-L., Tamagnini, F., Piegsa, J., Sung, K., Harvey, J., Oliver-Evans, A., Murray, T.K.,  
832 Ahmed, Z., Hutton, M.L., Randall, A., et al. (2019). Imbalance in the response of pre- and post-  
833 synaptic components to amyloidopathy. *Sci. Rep.* 9, 1–11.
- 834 Tackenberg, C., and Brandt, R. (2009). Divergent Pathways Mediate Spine Alterations and  
835 Cell Death Induced by Amyloid- $\beta$ , Wild-Type Tau, and R406W Tau. *J. Neurosci.* 29, 14439–  
836 14450.
- 837 Tai, H.-C., Serrano-Pozo, A., Hashimoto, T., Frosch, M.P., Spire-Jones, T.L., and Hyman,  
838 B.T. (2012). The synaptic accumulation of hyperphosphorylated tau oligomers in Alzheimer  
839 disease is associated with dysfunction of the ubiquitin-proteasome system. *Am. J. Pathol.* 181,  
840 1426–1435.
- 841 Thevenaz, P., Ruttimann, U.E., and Unser, M. (1998). A pyramid approach to subpixel  
842 registration based on intensity. *IEEE Trans. Image Process.* 7, 27–41.
- 843 Thies, E., and Mandelkow, E.-M. (2007). Missorting of Tau in Neurons Causes Degeneration  
844 of Synapses That Can Be Rescued by the Kinase MARK2/Par-1. *J. Neurosci.* 27, 2896–2907.

- 845 Wang, X., Smith, K., Pearson, M., Hughes, A., Cosden, M.L., Marcus, J., Hess, J.F., Savage,  
846 M.J., Rosahl, T., Smith, S.M., et al. (2018). Early intervention of tau pathology prevents  
847 behavioral changes in the rTg4510 mouse model of tauopathy. *PLOS ONE* 13, e0195486.
- 848 Wood, S.N. (2017). *Generalized additive models: an introduction with R* (CRC Press).
- 849 Yang, D. (2013). Perinatal Suppression of Tau P301L Has a Long Lasting Preventive Effect  
850 against Neurodegeneration. *Int. J. Neuropathol.* 53–59.
- 851 Yoshiyama, Y., Higuchi, M., Zhang, B., Huang, S.-M., Iwata, N., Saïdo, T.C., Maeda, J.,  
852 Suhara, T., Trojanowski, J.Q., and Lee, V.M.-Y. (2007). Synapse loss and microglial activation  
853 precede tangles in a P301S tauopathy mouse model. *Neuron* 53, 337–351.
- 854 Zempel, H., and Mandelkow, E. (2014). Lost after translation: missorting of Tau protein and  
855 consequences for Alzheimer disease. *Trends Neurosci.* 37, 721–732.
- 856 Zhou, L., McInnes, J., Wierda, K., Holt, M., Herrmann, A.G., Jackson, R.J., Wang, Y.-C.,  
857 Swerts, J., Beyens, J., Miskiewicz, K., et al. (2017). Tau association with synaptic vesicles  
858 causes presynaptic dysfunction. *Nat. Commun.* 8, 15295.
- 859
